# Supplementary material
Source: PubMed Central journal article supplement (PMC5398413)
Supplement: NIHMS848265-supplement-Suppl__Data.pdf [file NIHMS848265-supplement-Suppl__Data.pdf]

# Supplementary Information

## Genomic deletion of malic enzyme 2 confers collateral lethality in pancreatic cancer

Prasenjit Dey<sup>1,3,11</sup>, Joelle Baddour<sup>4,11</sup>, Florian Muller<sup>2</sup>, Chia Chin Wu<sup>3</sup>, Huamin Wang<sup>5</sup>, Wen-Ting Liao<sup>1</sup>, Zangdao Lan<sup>1</sup>, Alina Chen<sup>1</sup>, Tony Gutschner<sup>3</sup>, Yaan Kang<sup>10</sup>, Jason Fleming<sup>10</sup>, Nikunj Satani<sup>2</sup>, Di Zhao<sup>1</sup>, Abhinav Achreja<sup>4</sup>, Lifeng Yang<sup>4</sup>, Jiyeon Lee<sup>4</sup>, Edward Chang<sup>3,6</sup>, Giannicola Genovese<sup>3</sup>, Andrea Viale<sup>3</sup>, Haoqiang Ying<sup>7</sup>, Giulio Draetta<sup>3,6,7</sup>, Anirban Maitra<sup>8,9</sup>, Y. Alan Wang<sup>1,3\*</sup>, Deepak Nagrath<sup>4\*</sup>, Ronald A. DePinho<sup>1\*</sup>

<sup>1</sup>Department of Cancer Biology, The University of Texas MD Anderson Cancer Center, Houston, TX 77030, USA

<sup>2</sup>Department of Cancer Systems Imaging, The University of Texas MD Anderson Cancer Center, Houston, TX 77030, USA

<sup>3</sup>Department of Genomic Medicine, The University of Texas MD Anderson Cancer Center, Houston, TX 77030, USA

<sup>4</sup>Department of Chemical and Biomolecular Engineering, Department of Bioengineering, Rice University, 6100 Main Street, Houston, TX 77005, USA

<sup>5</sup>Department of Pathology, Division of Pathology/Lab Medicine, The University of Texas MD Anderson Cancer Center, Houston, TX 77030, USA

<sup>6</sup>Institute for Applied Cancer Science, The University of Texas MD Anderson Cancer Center, Houston, TX 77030, USA

<sup>7</sup>Department of Molecular and Cellular Oncology, The University of Texas MD Anderson Cancer Center, Houston, TX 77030, USA

<sup>8</sup>Department of Translational Molecular Pathology, The University of Texas MD Anderson Cancer Center, Houston, TX 77030, USA

<sup>9</sup>Sheikh Ahmed Bin Zayed Al Nahyan Center for Pancreatic Cancer Research, The University of Texas MD Anderson Cancer Center, Houston, TX 77030, USA

<sup>10</sup>Department of Surgical Oncology, Division of Surgery, The University of Texas MD Anderson Cancer Center, Houston, TX 77030, USA

<sup>11</sup>These authors contributed equally

\*Correspondance to:

Ronald DePinho, M.D., The University of Texas MD Anderson Cancer Center, 1515 Holcombe Boulevard, Houston, TX 77030. Phone: 713-792-7928; Fax: 713-794-4005; E-

mail: [rdepinho@mdanderson.org](mailto:rdepinho@mdanderson.org); [Y. Alan Wang, Email: yalanwang@mdanderson.org](mailto:Y. Alan Wang, Email: yalanwang@mdanderson.org);

Deepak Nagrath, Email: [deepak.nagrath@rice.edu](mailto:deepak.nagrath@rice.edu)

## Supplementary Contents

**Supplementary Figure 1:** Un-cropped immunoblot scans for **Fig 2b**.

**Supplementary Figure 2:** Un-cropped immunoblot scans for **Fig 3f**.

**Supplementary Figure 3:** Un-cropped immunoblot scans for **Fig 4a**.

**Supplementary Figure 4:** Un-cropped immunoblot scans for **Fig 4b**.

**Supplementary Figure 5:** Un-cropped immunoblot scans for **Fig 4c**.

**Supplementary Figure 6:** Un-cropped immunoblot scans for **Fig 4d**.

**Supplementary Figure 7:** Un-cropped immunoblot scans for **Fig 4f**.

**Supplementary Figure 8:** Un-cropped immunoblot scans for **Fig 4g**.

**Supplementary Figure 9:** Un-cropped immunoblot scans for **Fig 4i**.

**Supplementary Figure 10:** Un-cropped immunoblot scans for **Extended Fig 2c**.

**Supplementary Figure 11:** Un-cropped immunoblot scans for **Extended Fig. 3a**

**Supplementary Figure 12:** Un-cropped immunoblot scans for **Extended Fig. 3b**

**Supplementary Figure 13:** Un-cropped immunoblot scans for **Extended Fig. 3c**

**Supplementary Figure 14:** Un-cropped immunoblot scans for **Extended Fig. 3d**

**Supplementary Figure 15:** Un-cropped immunoblot scans for **Extended Fig. 3k**

**Supplementary Figure 16:** Un-cropped immunoblot scans for **Extended Fig. 5c**

**Supplementary Figure 17:** Un-cropped immunoblot scans for **Extended Fig. 8b**

**Supplementary Figure 18:** Un-cropped immunoblot scans for **Extended Fig. 8c**

**Supplementary Figure 19:** Un-cropped immunoblot scans for **Extended Fig. 8d**

**Supplementary Figure 20:** Un-cropped immunoblot scans for **Extended Fig. 8e**

**Supplementary Figure 21:** Un-cropped immunoblot scans for **Extended Fig. 8f**

**Supplementary Figure 22:** Un-cropped immunoblot scans for **Extended Fig. 8g**

**Supplementary Figure 23:** Un-cropped immunoblot scans for **Extended Fig. 9c**

**Supplementary Figure 24:** Un-cropped immunoblot scans for **Extended Fig. 9d**

**Additional references**

# Supplementary Figure 1

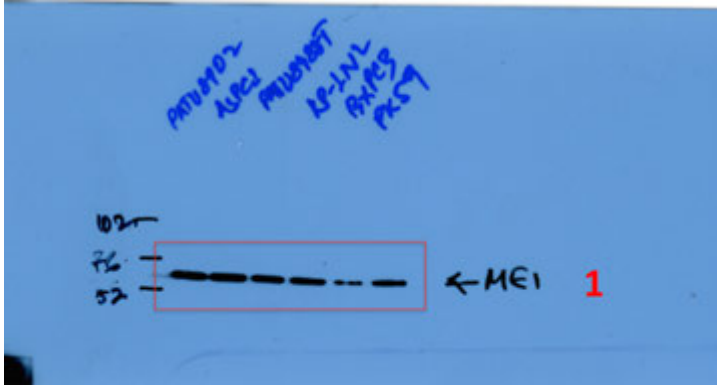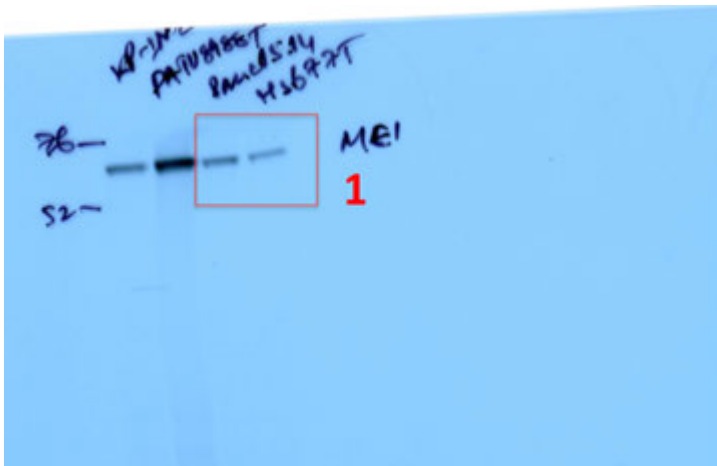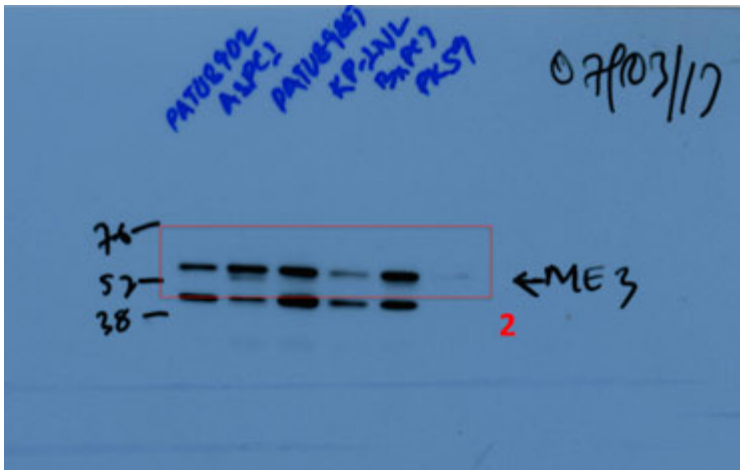



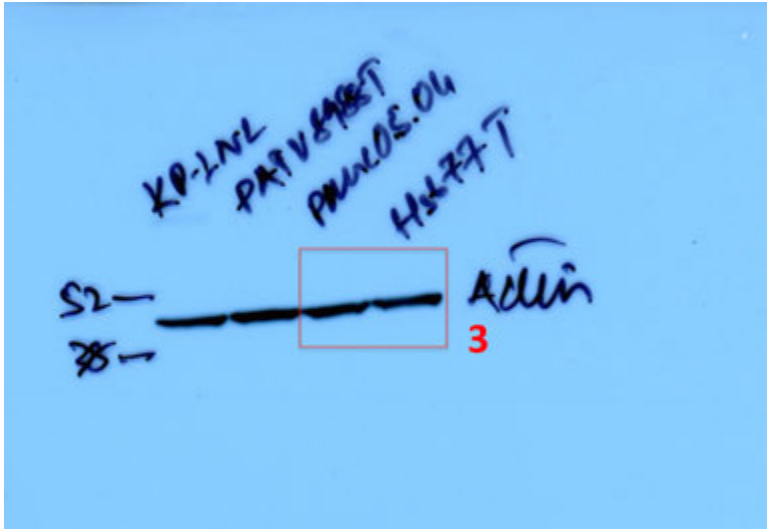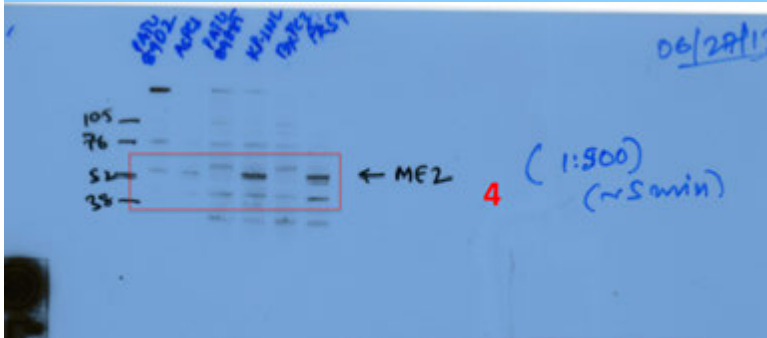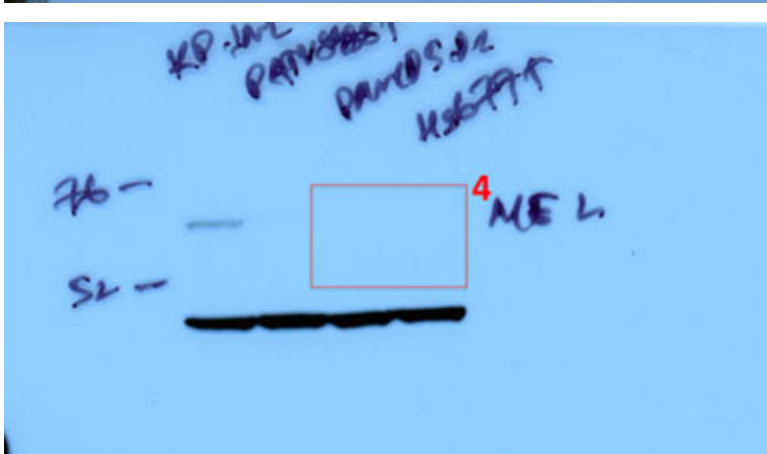

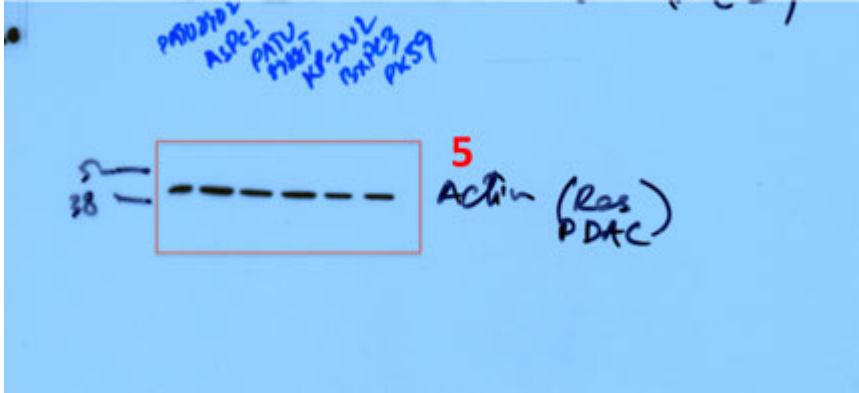

**Supplementary Figure 1:** Un-cropped immunoblot scans for **Fig 2b**. Raw film scans with red box indicating the area shown in the display. Numbers in red indicates the panel (numbered from top to down) in the figure.

## Supplementary Figure 2

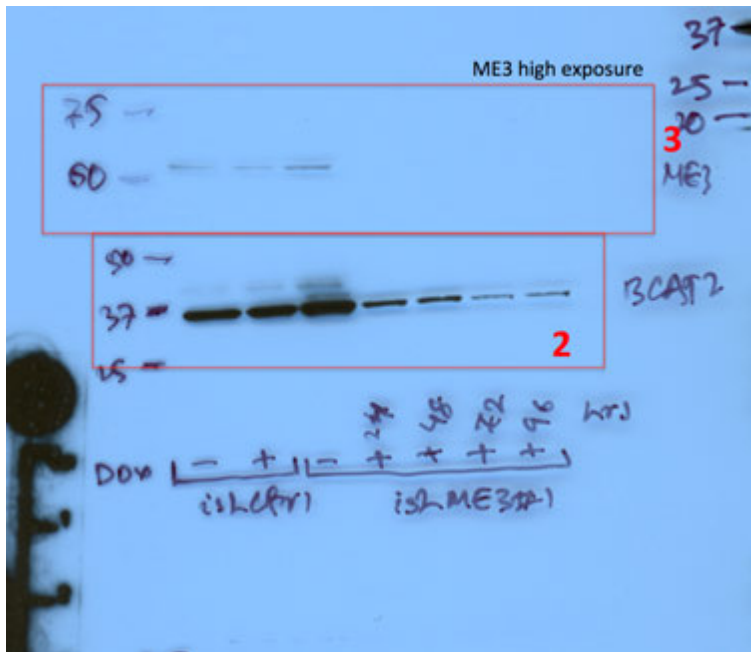



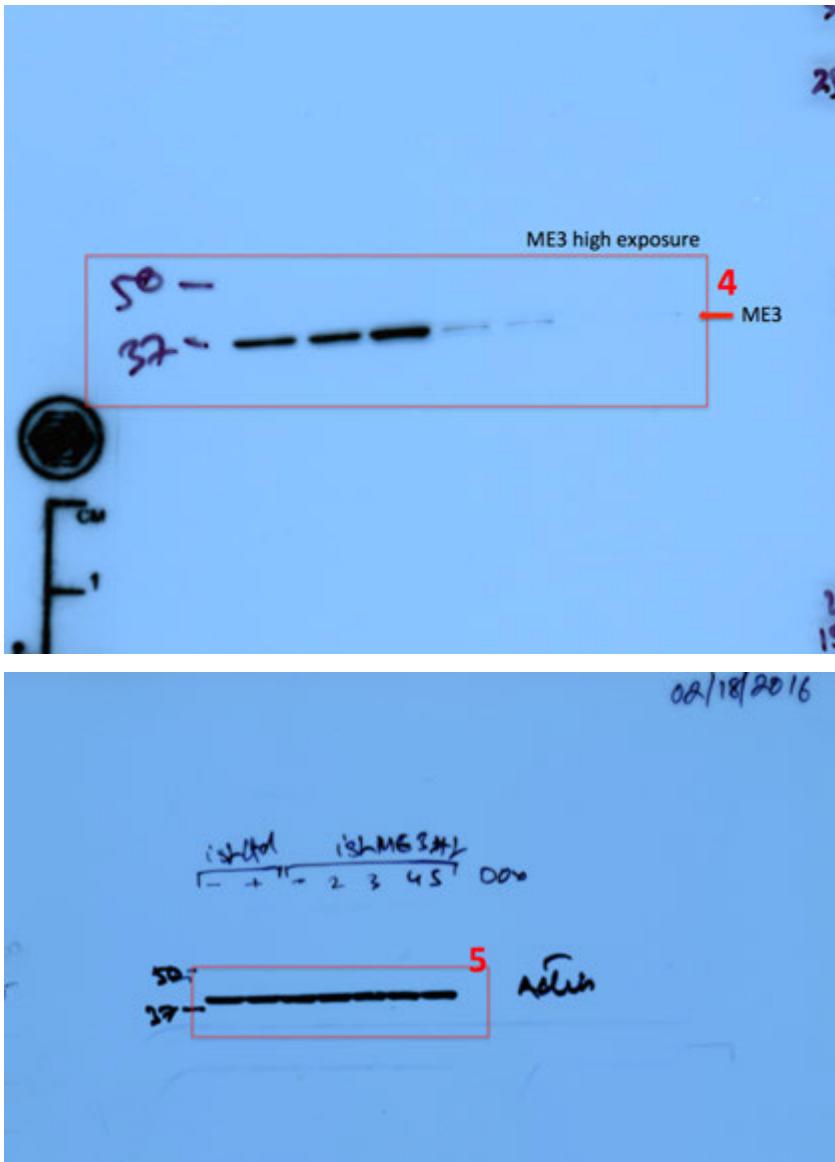

**Supplementary Figure 2:** Un-cropped immunoblot scans for **Fig 3f**. Raw film scans with red box indicating the area shown in the display. Numbers in red indicates the panel (numbered from top to down) in the figure.

### Supplementary Figure 3

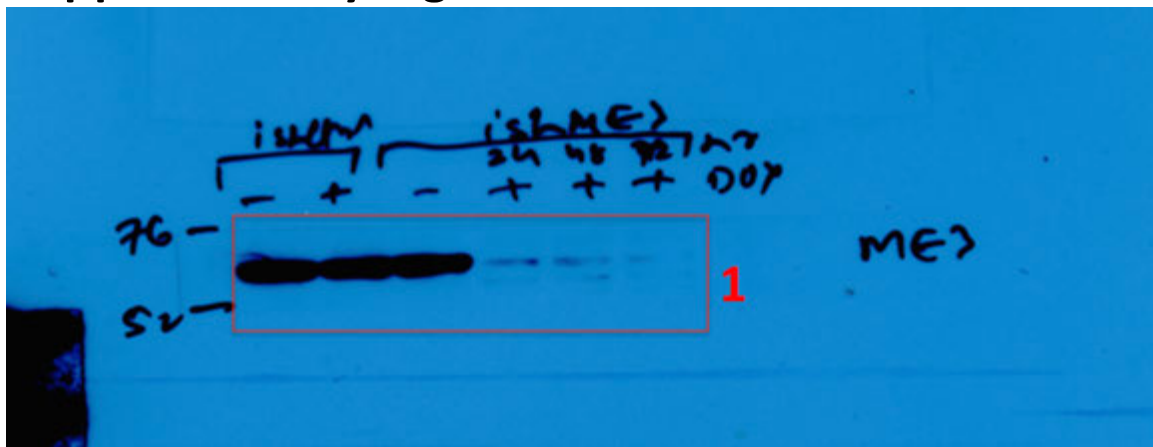

DOX  
DAYS

| CS2004 |   | ISHMETHI, |   |   |   |
|--------|---|-----------|---|---|---|
| -      | + | -         | + |   |   |
| 4      | 4 | 4         | 2 | 3 | 4 |

76  
52

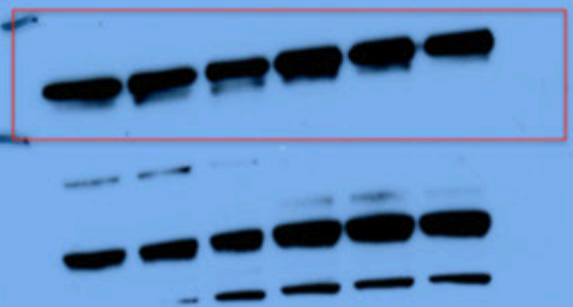

AMPK $\alpha$   
①

3

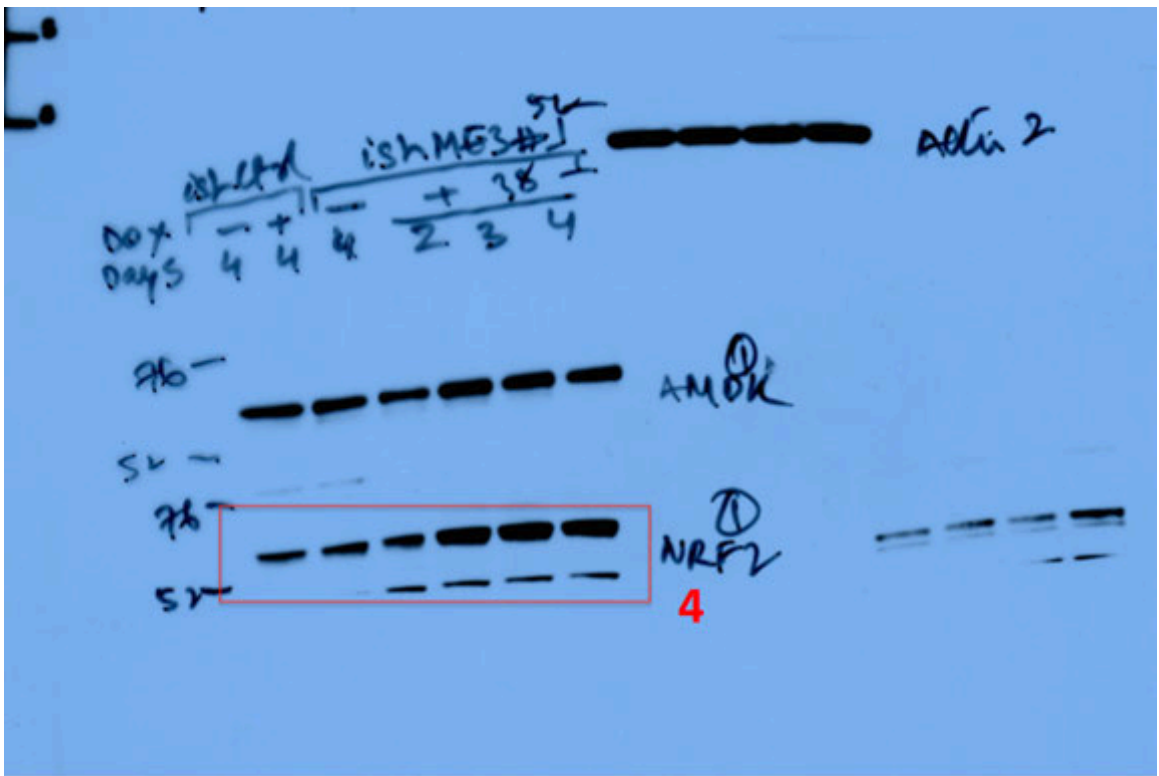

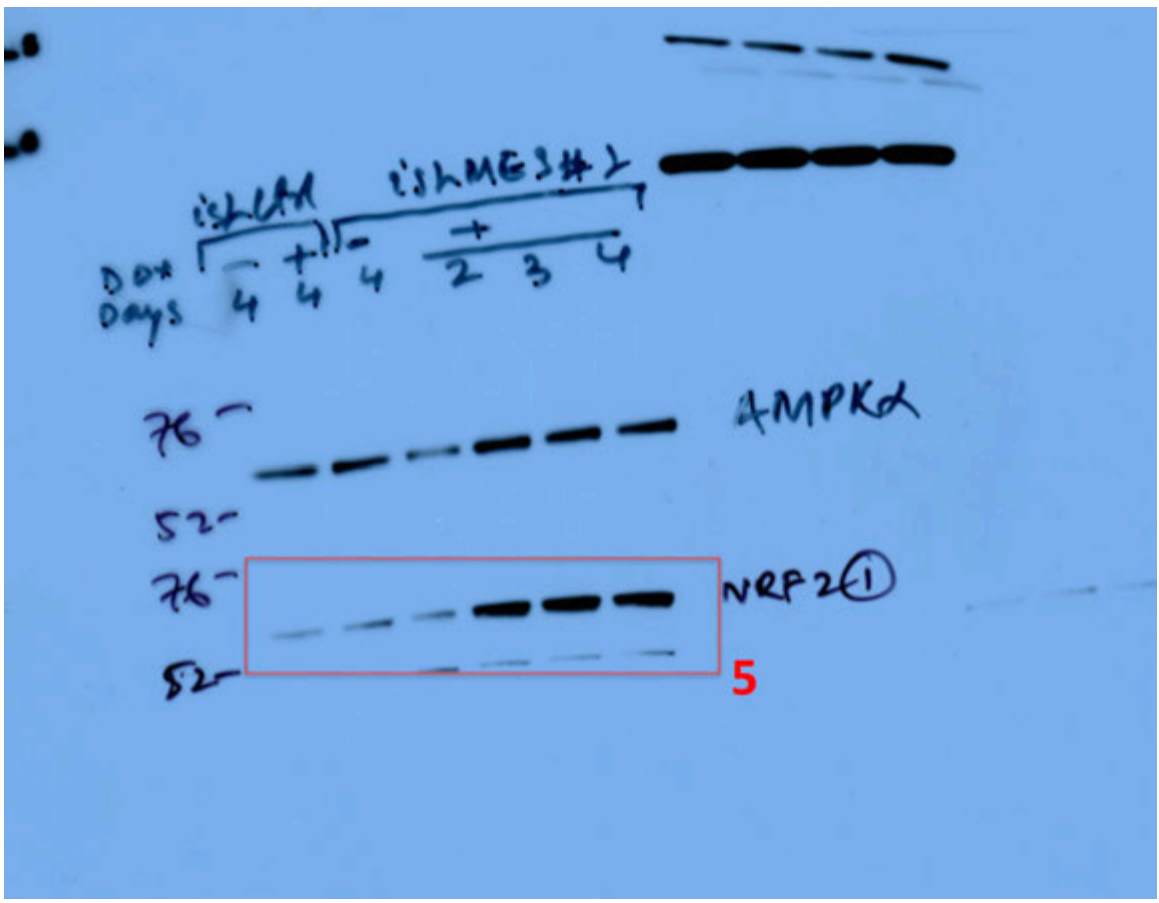

ISH LCM      ISH ME2  
 - + - +  
 24 48 72 hr

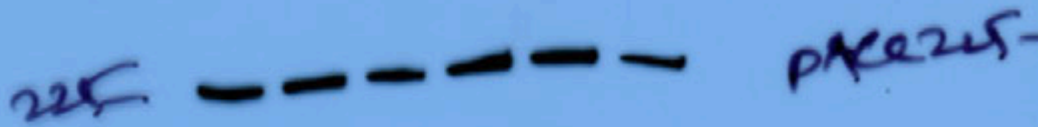

①

245 —  
 150 —  
 125 —

①  
 pCCTA

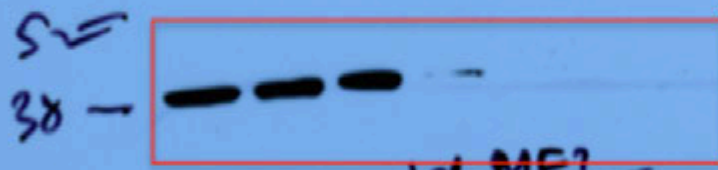

7

①  
 BCAT238

ISH LCM      ISH ME2  
 - + - +  
 24 48 72 hr

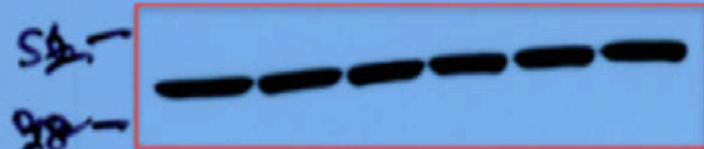

8

Acln5  
 ① 98 —

**Supplementary Figure 3:** Un-cropped immunoblot scans for **Fig 4a**. Raw film scans with red box indicating the area shown in the display. Numbers in red indicates the panel (numbered from top to down) in the figure.

# Supplementary Figure 4

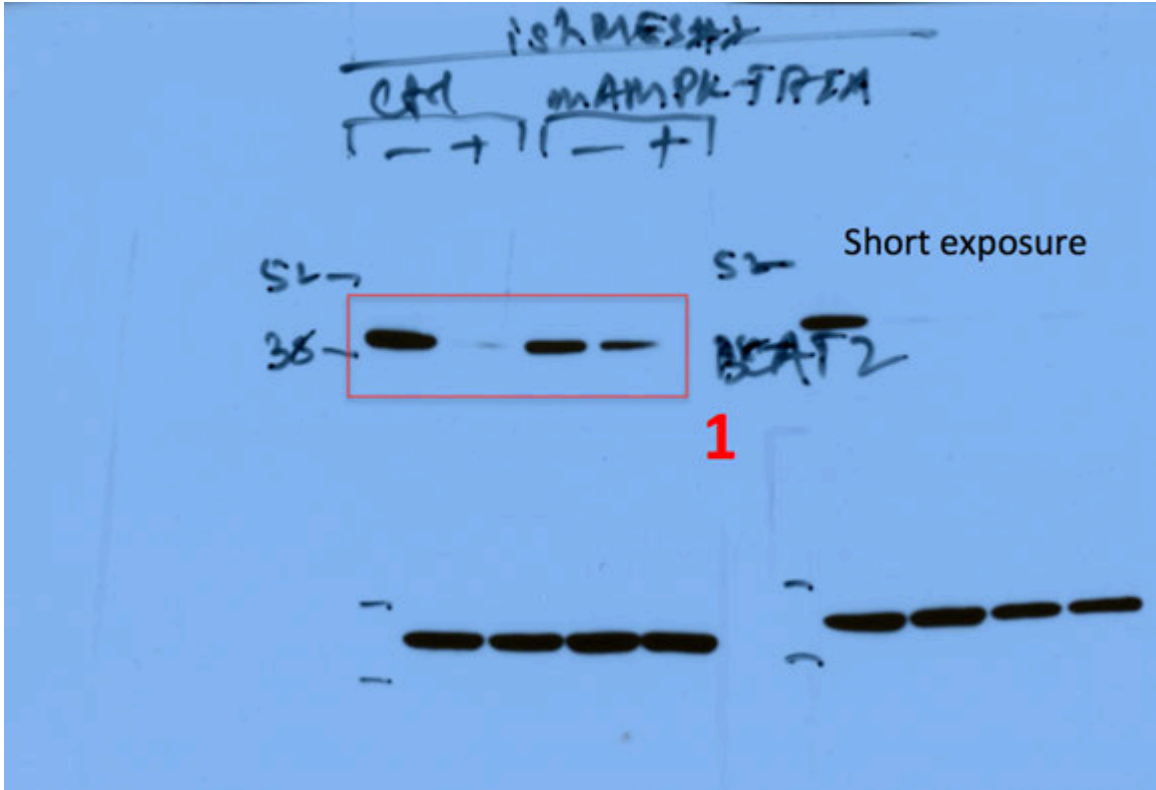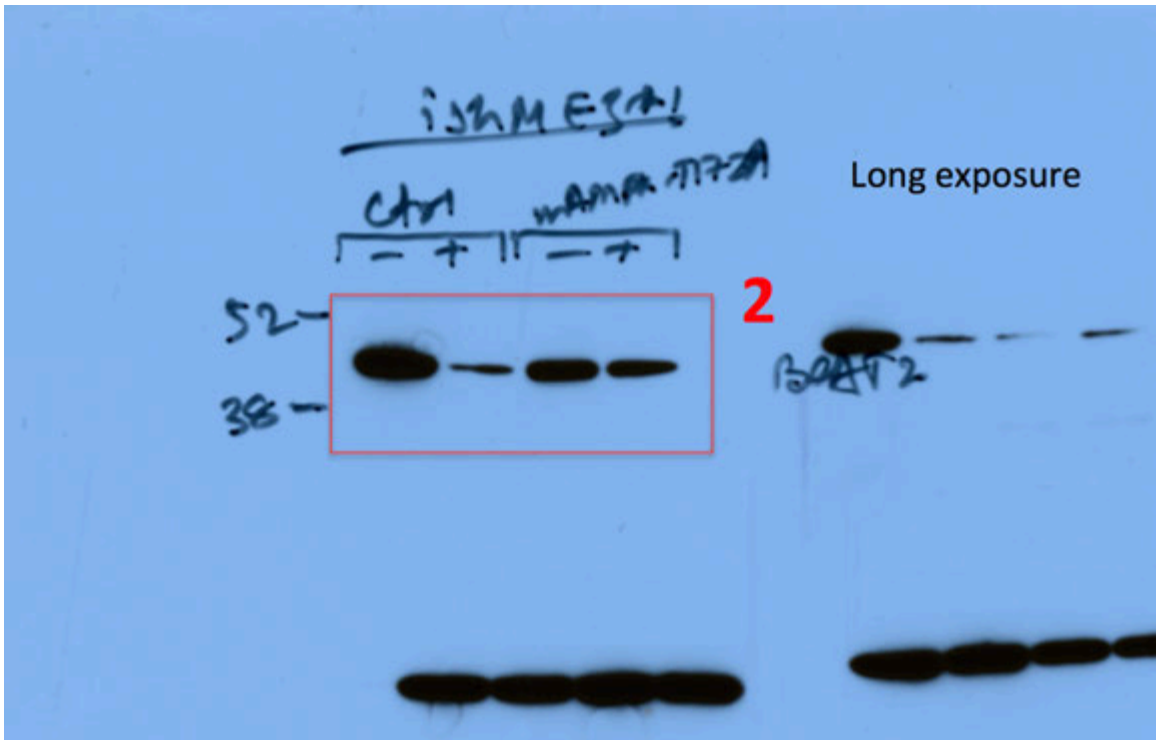



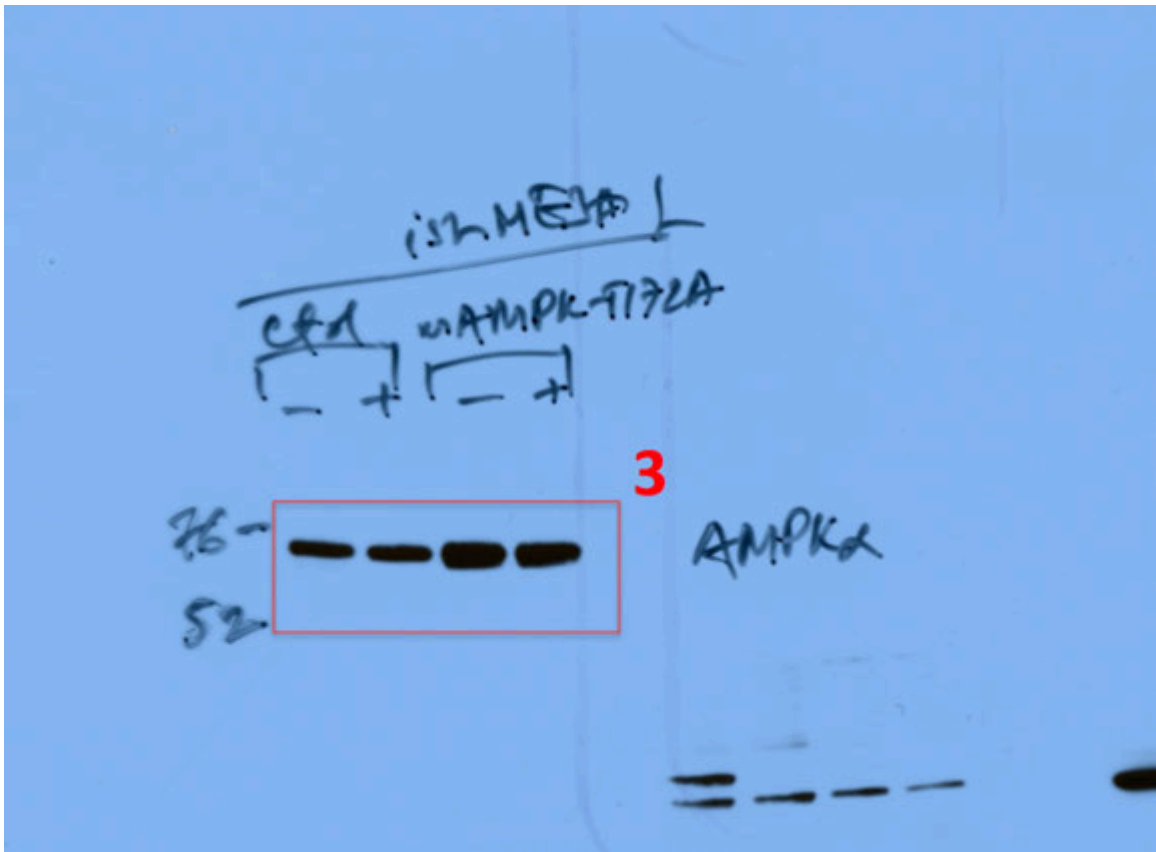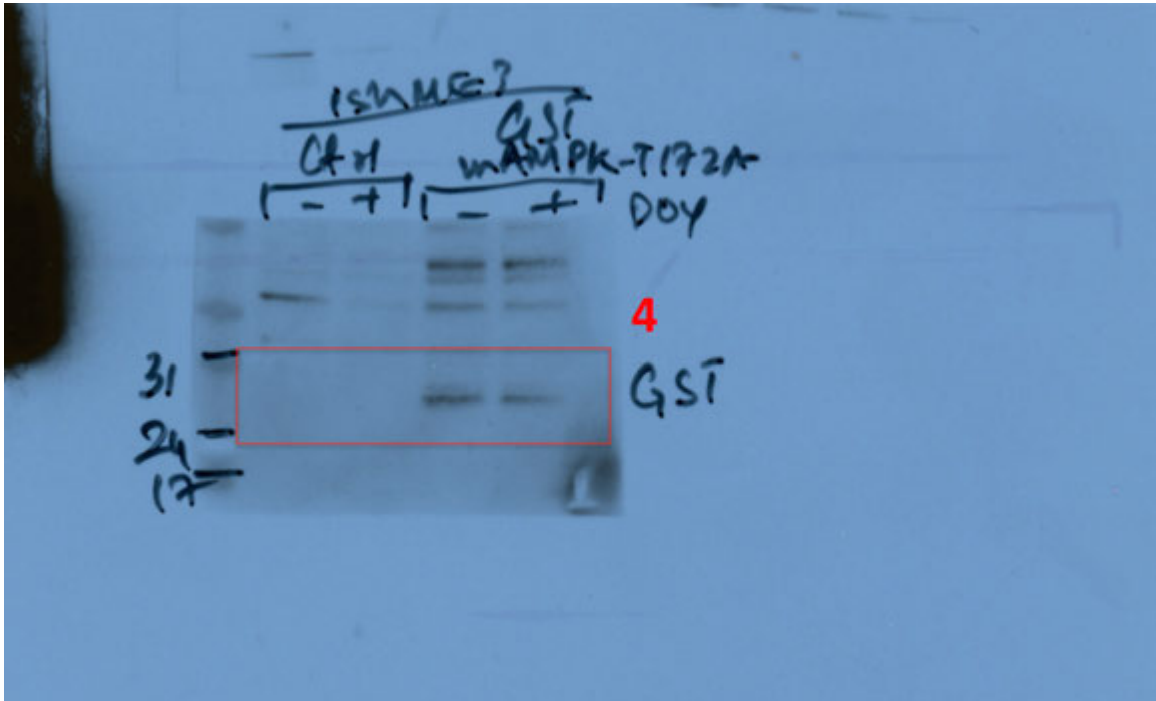

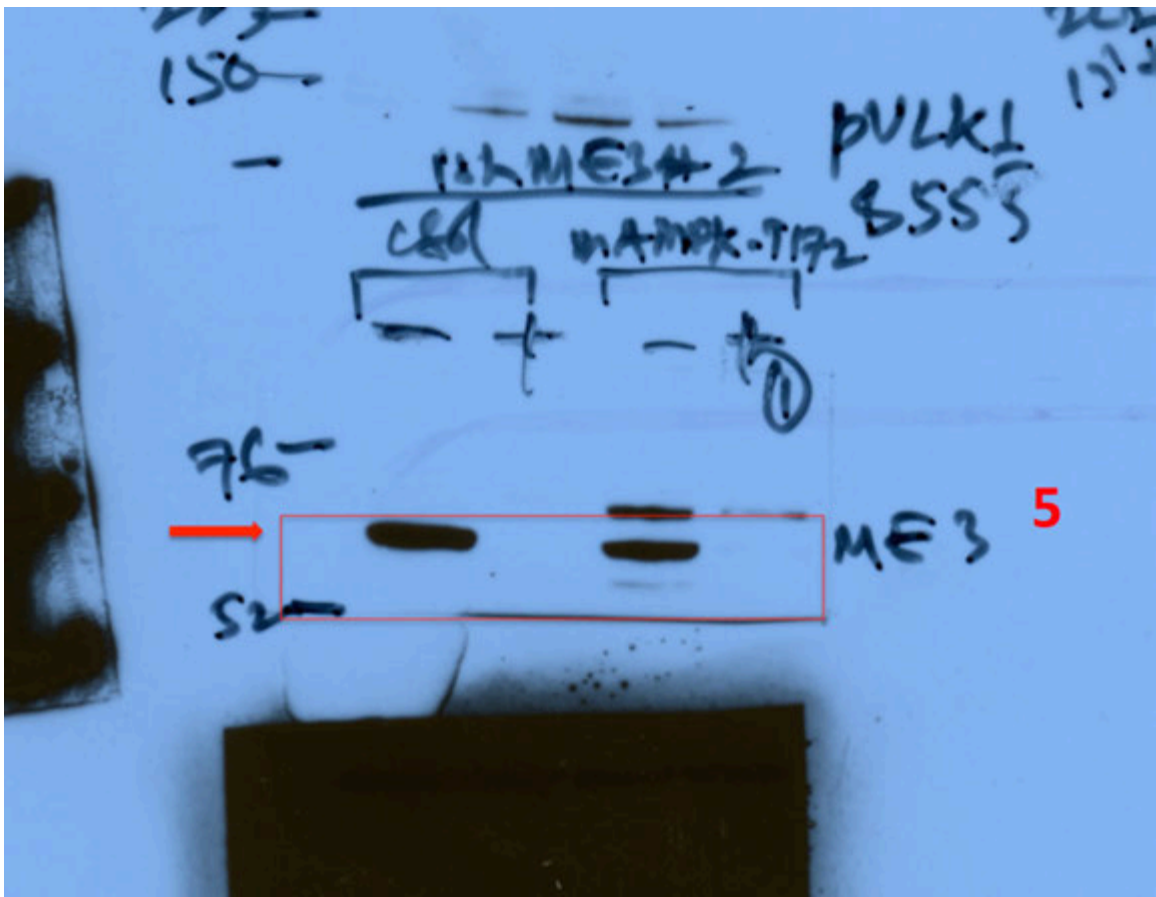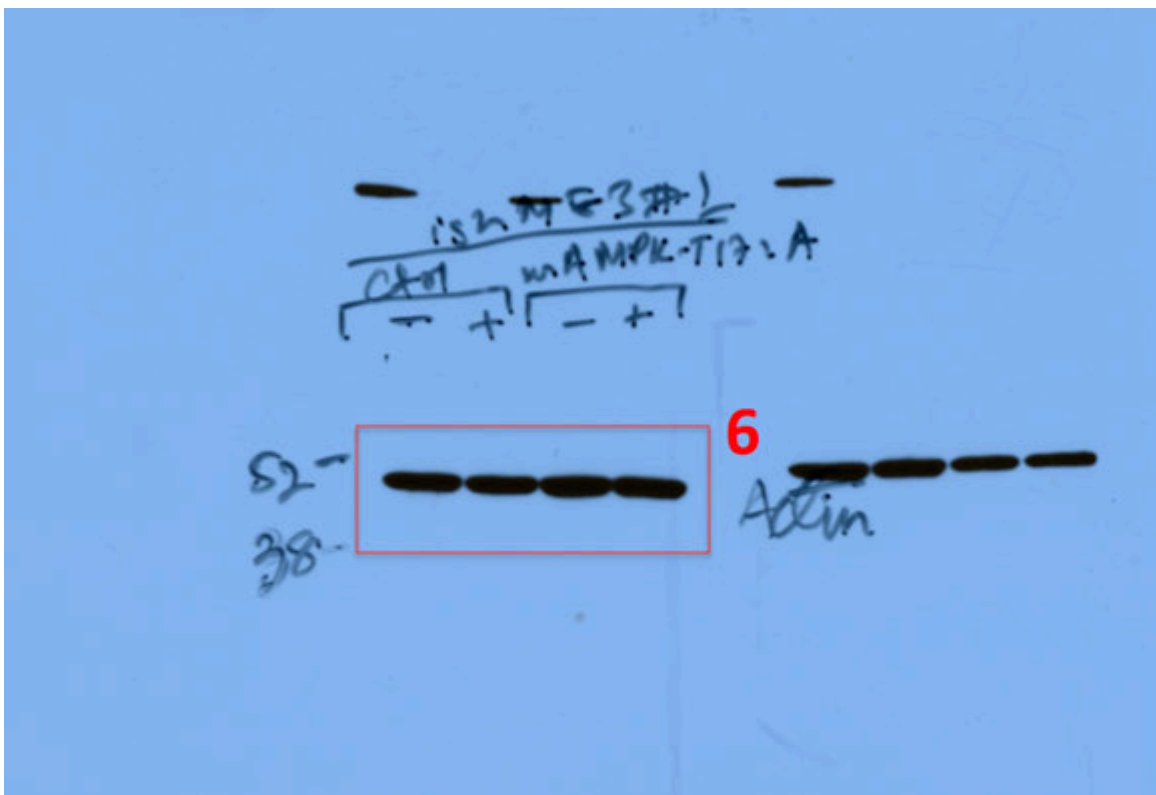

**Supplementary Figure 4:** Un-cropped immunoblot scans for **Fig 4b**. Raw film scans with red box indicating the area shown in the display. Numbers in red indicates the panel (numbered from top to down) in the figure.

# Supplementary Figure 5

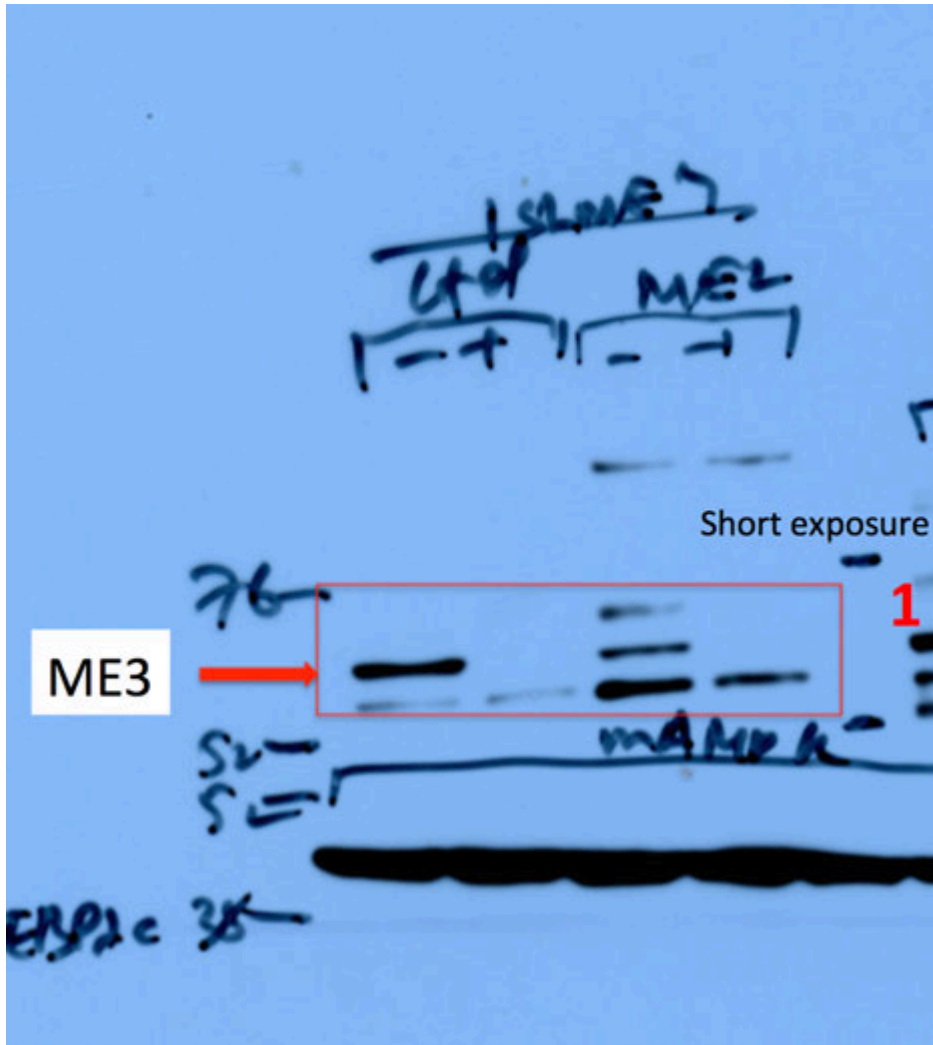

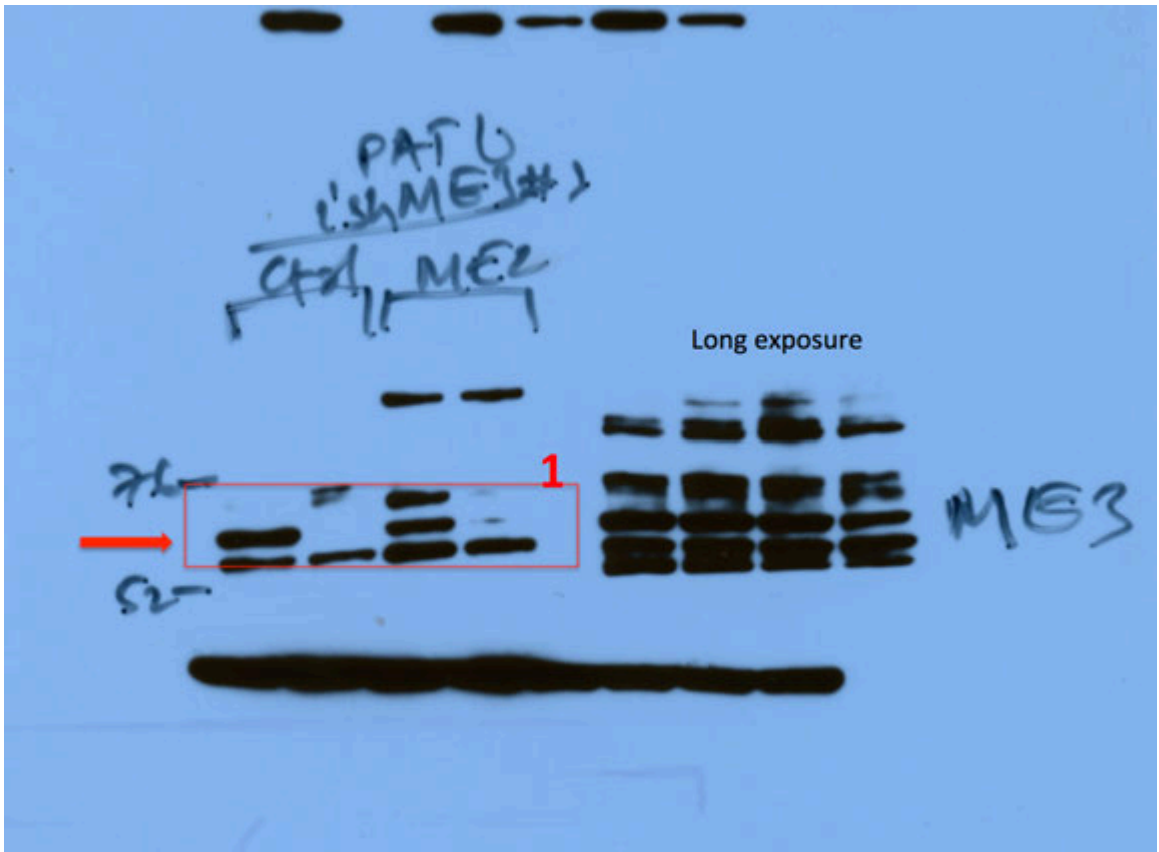

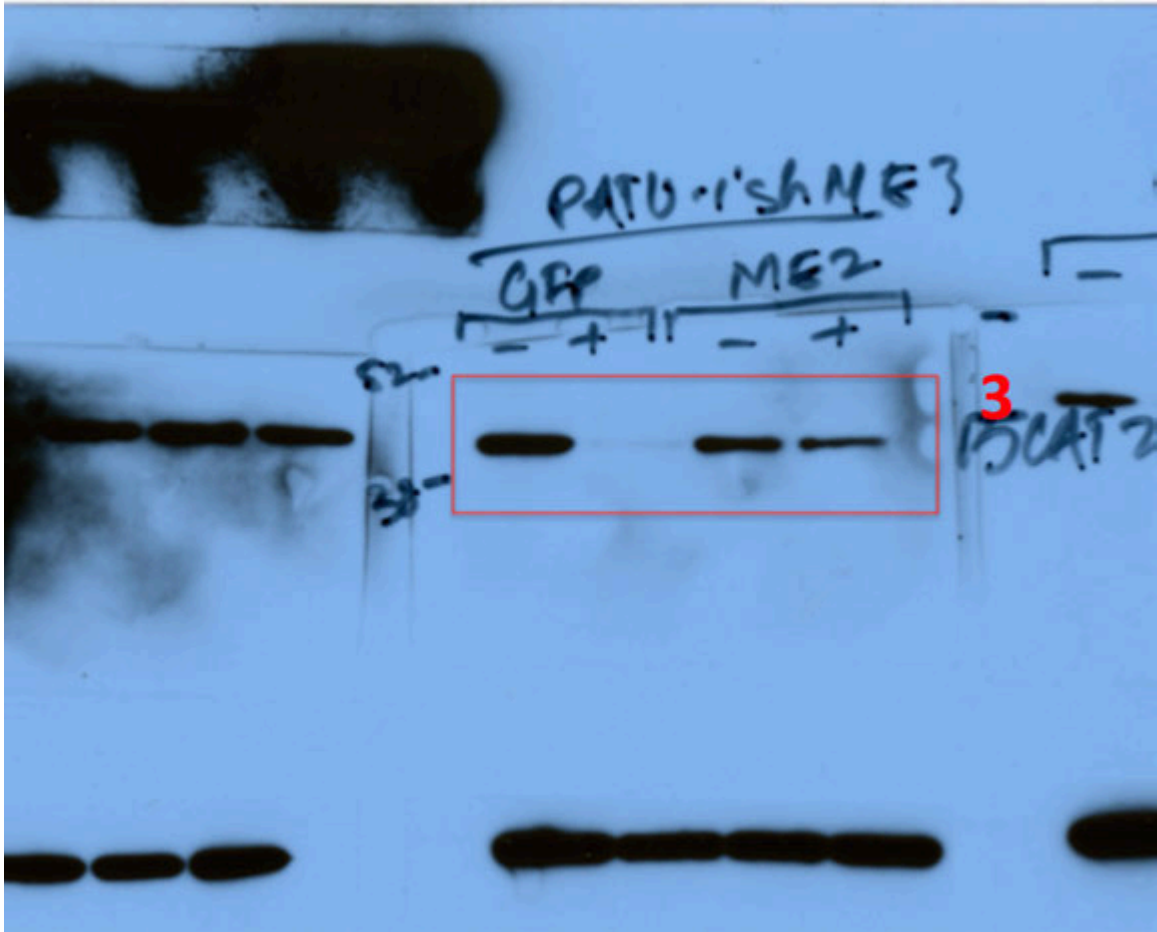

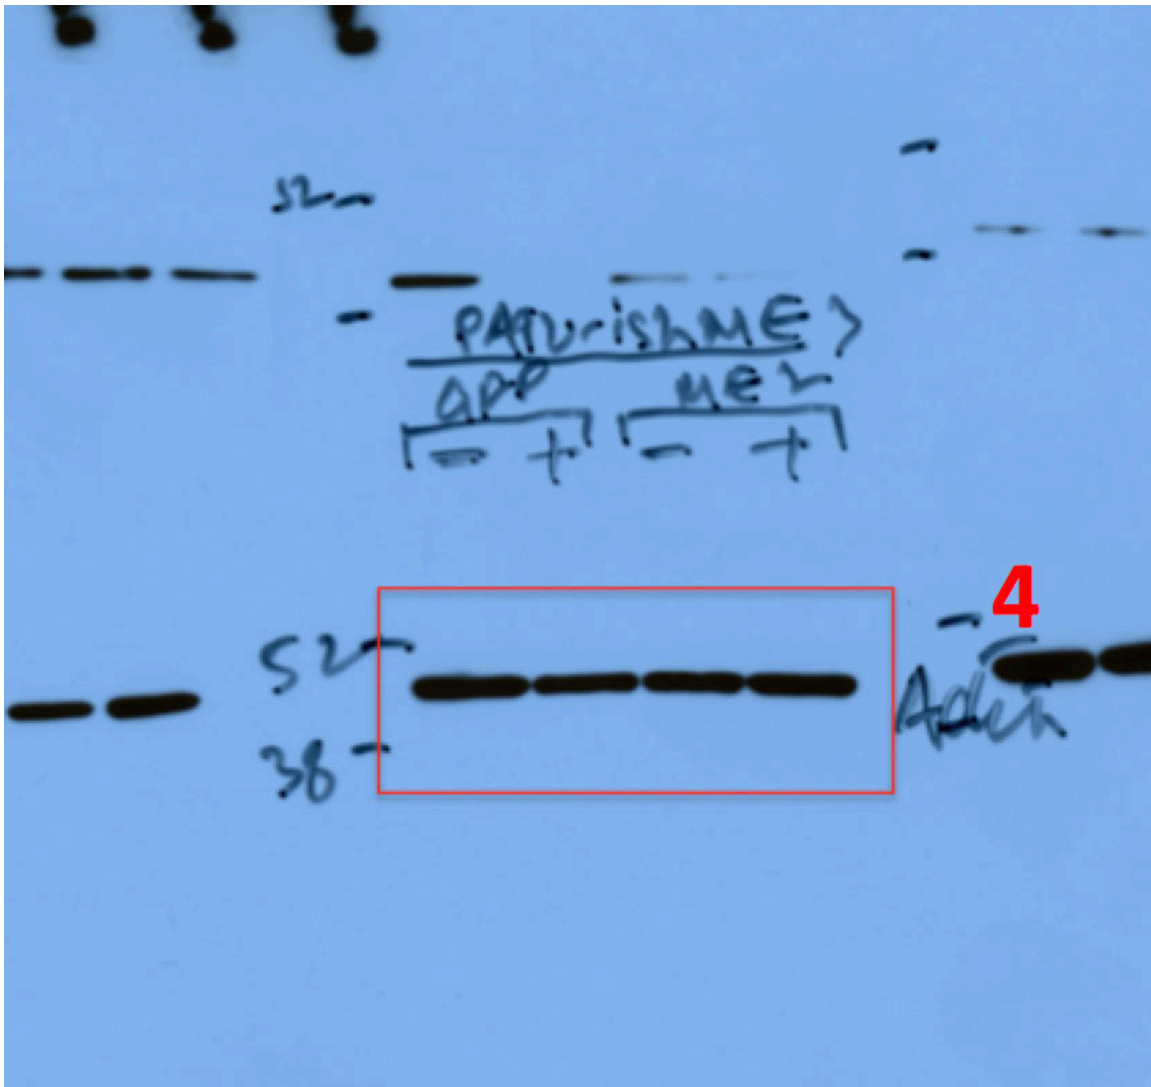

**Supplementary Figure 5:** Un-cropped immunoblot scans for Fig 4c. Raw film scans with red box indicating the area shown in the display. Numbers in red indicates the panel (numbered from top to down) in the figure.





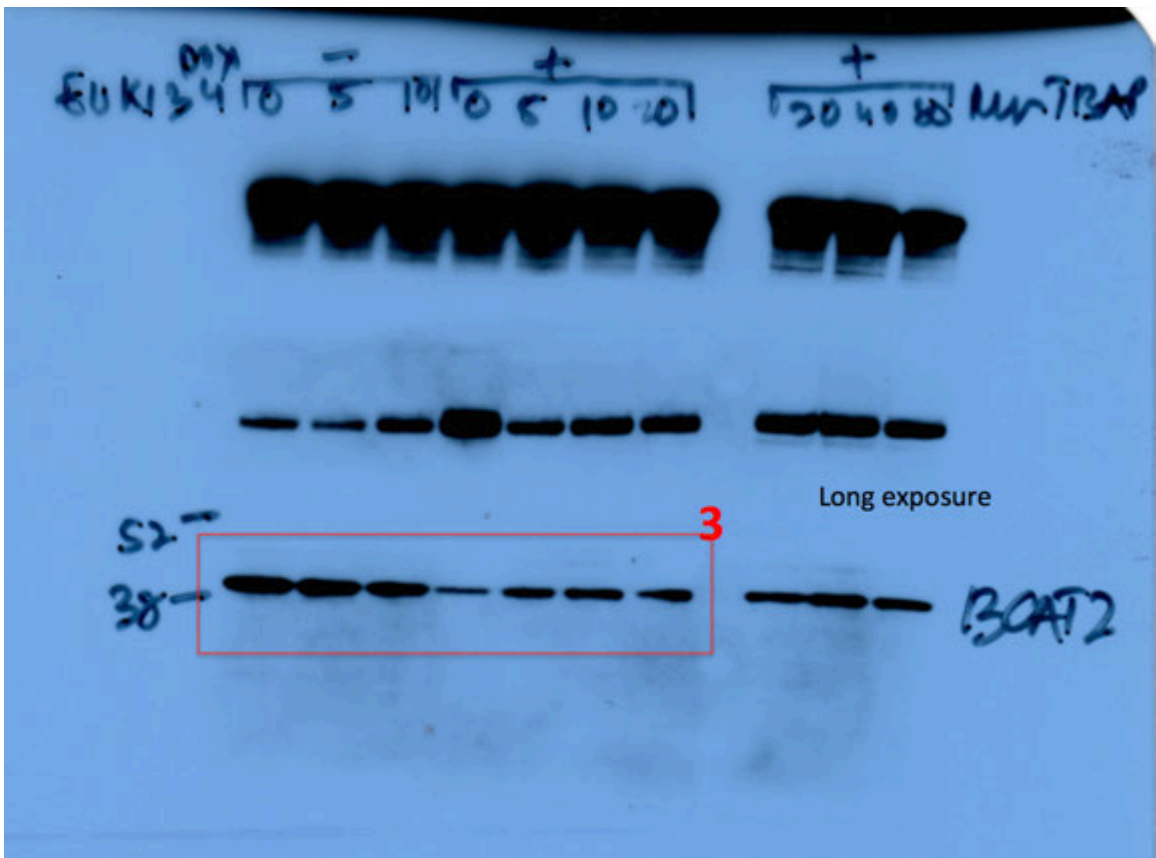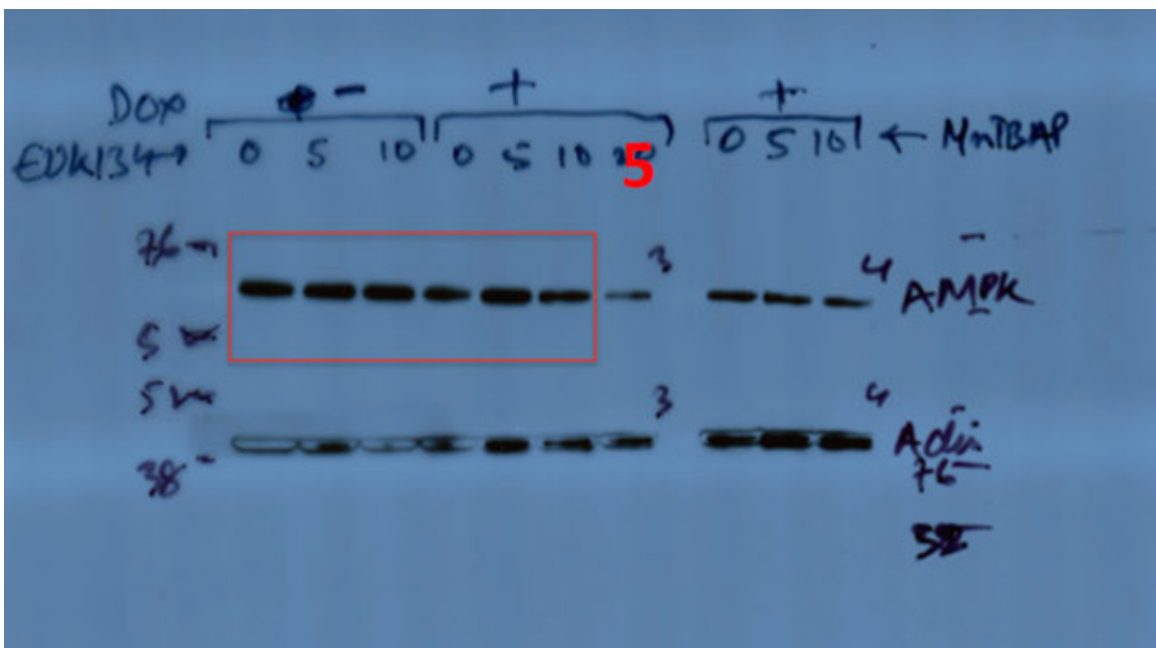

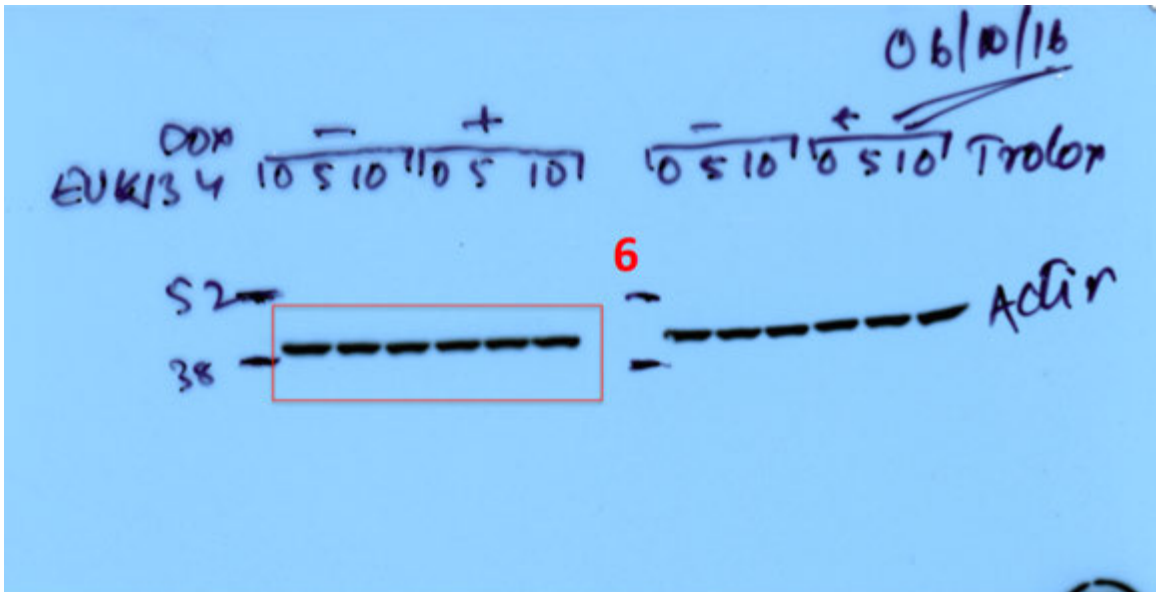

**Supplementary Figure 6:** Un-cropped immunoblot scans for **Fig 4d**. Raw film scans with red box indicating the area shown in the display. Numbers in red indicates the panel (numbered from top to down) in the figure.

# Supplementary Figure 7

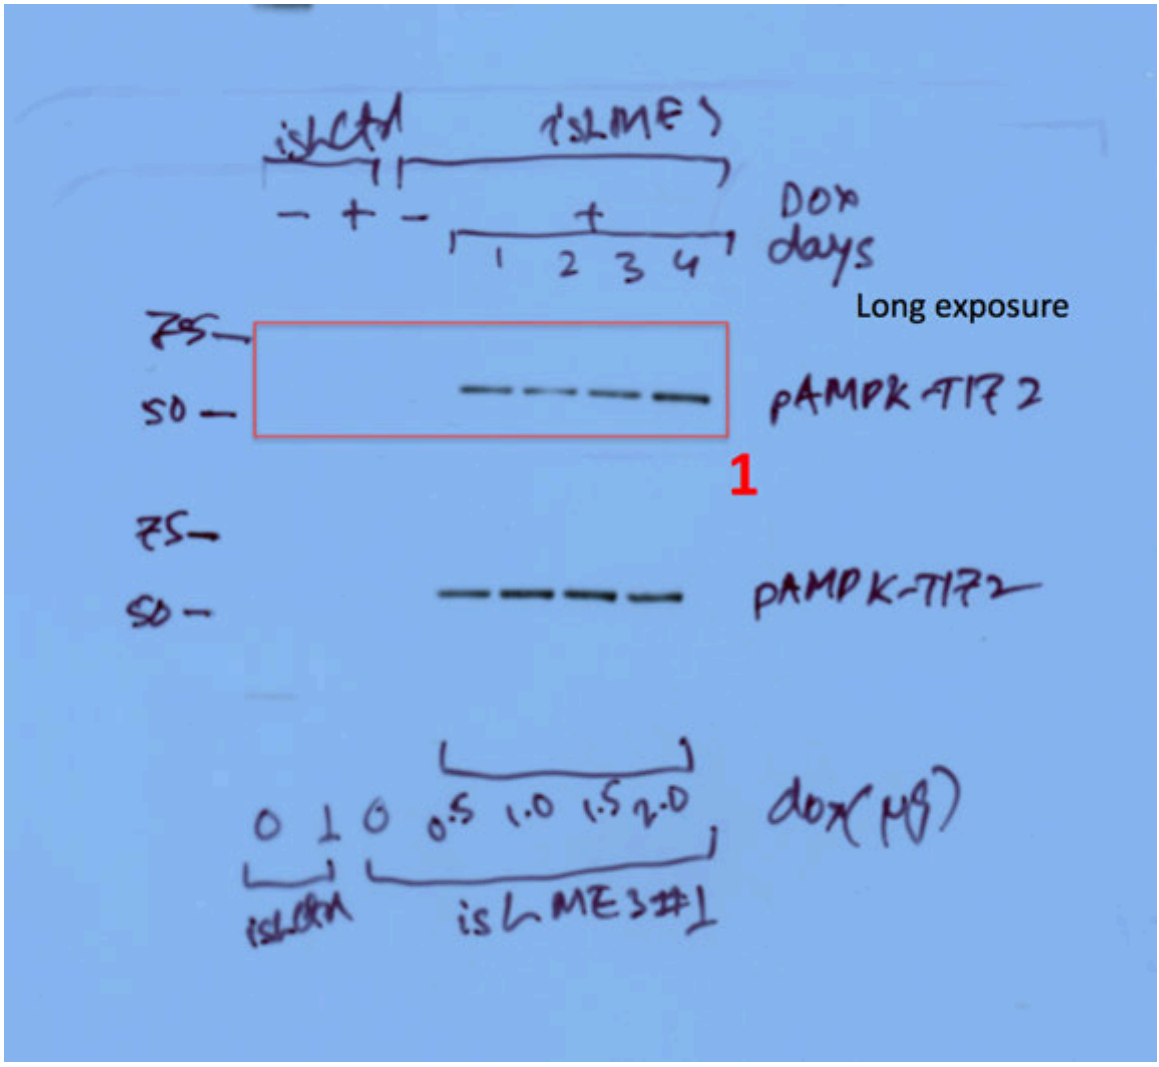



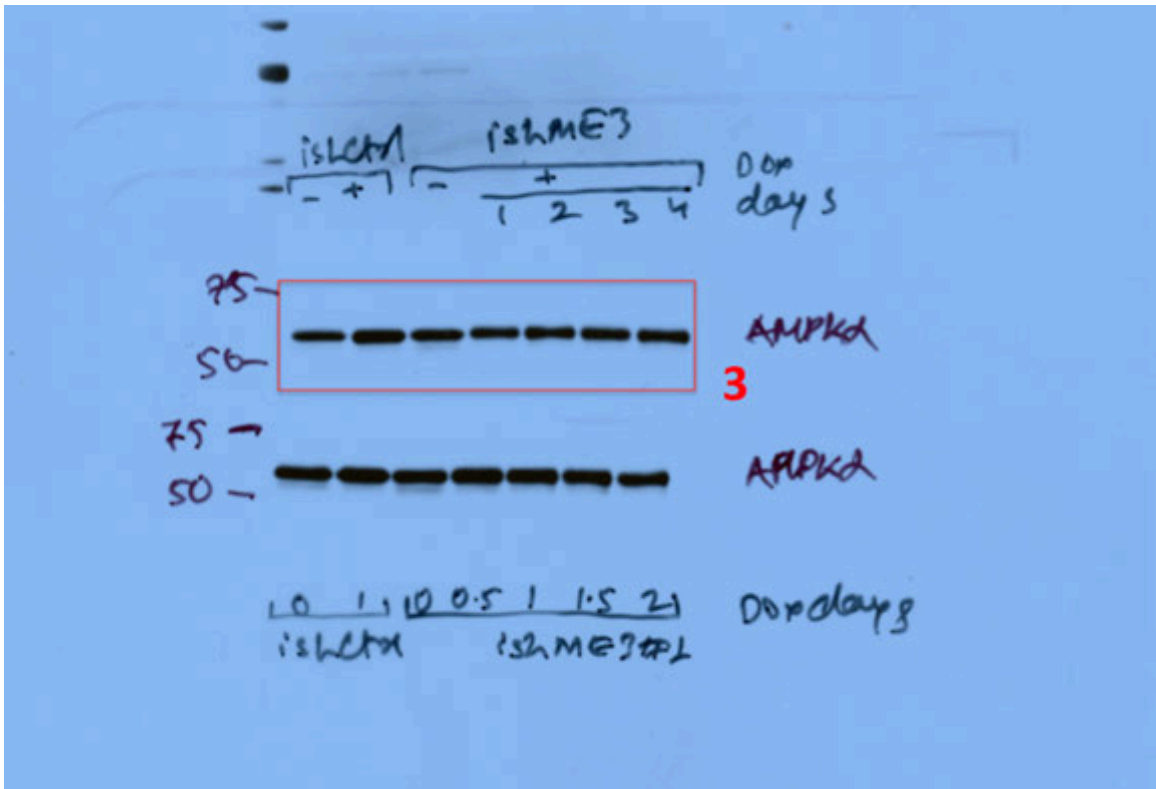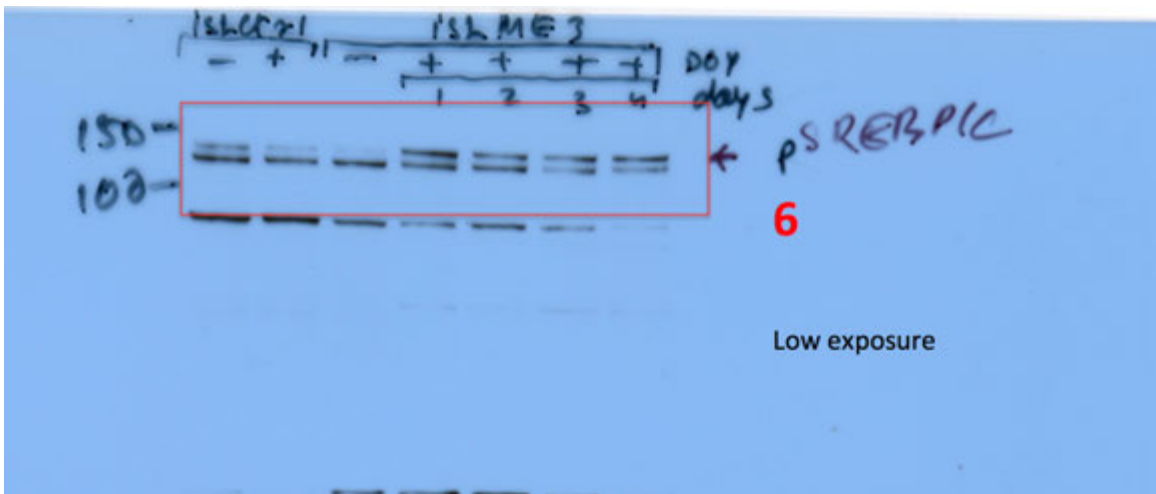

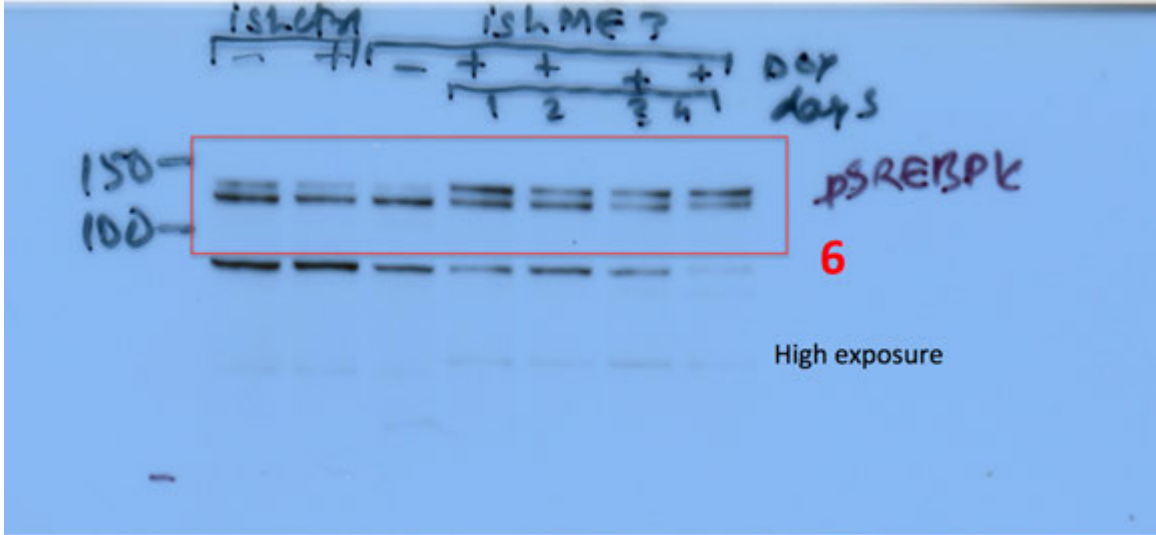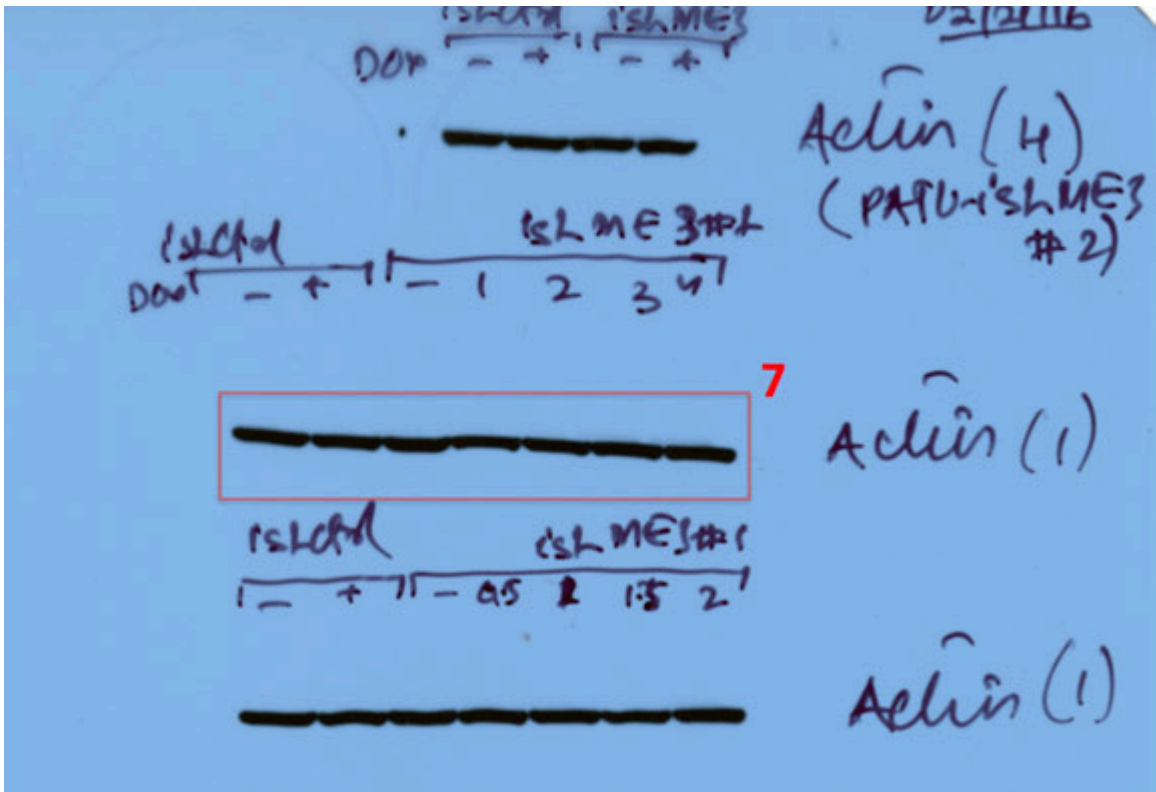

**Supplementary Figure 7:** Un-cropped immunoblot scans for Fig 4f. Raw film scans with red box indicating the area shown in the display. Numbers in red indicates the panel (numbered from top to down) in the figure.

# Supplementary Figure 8

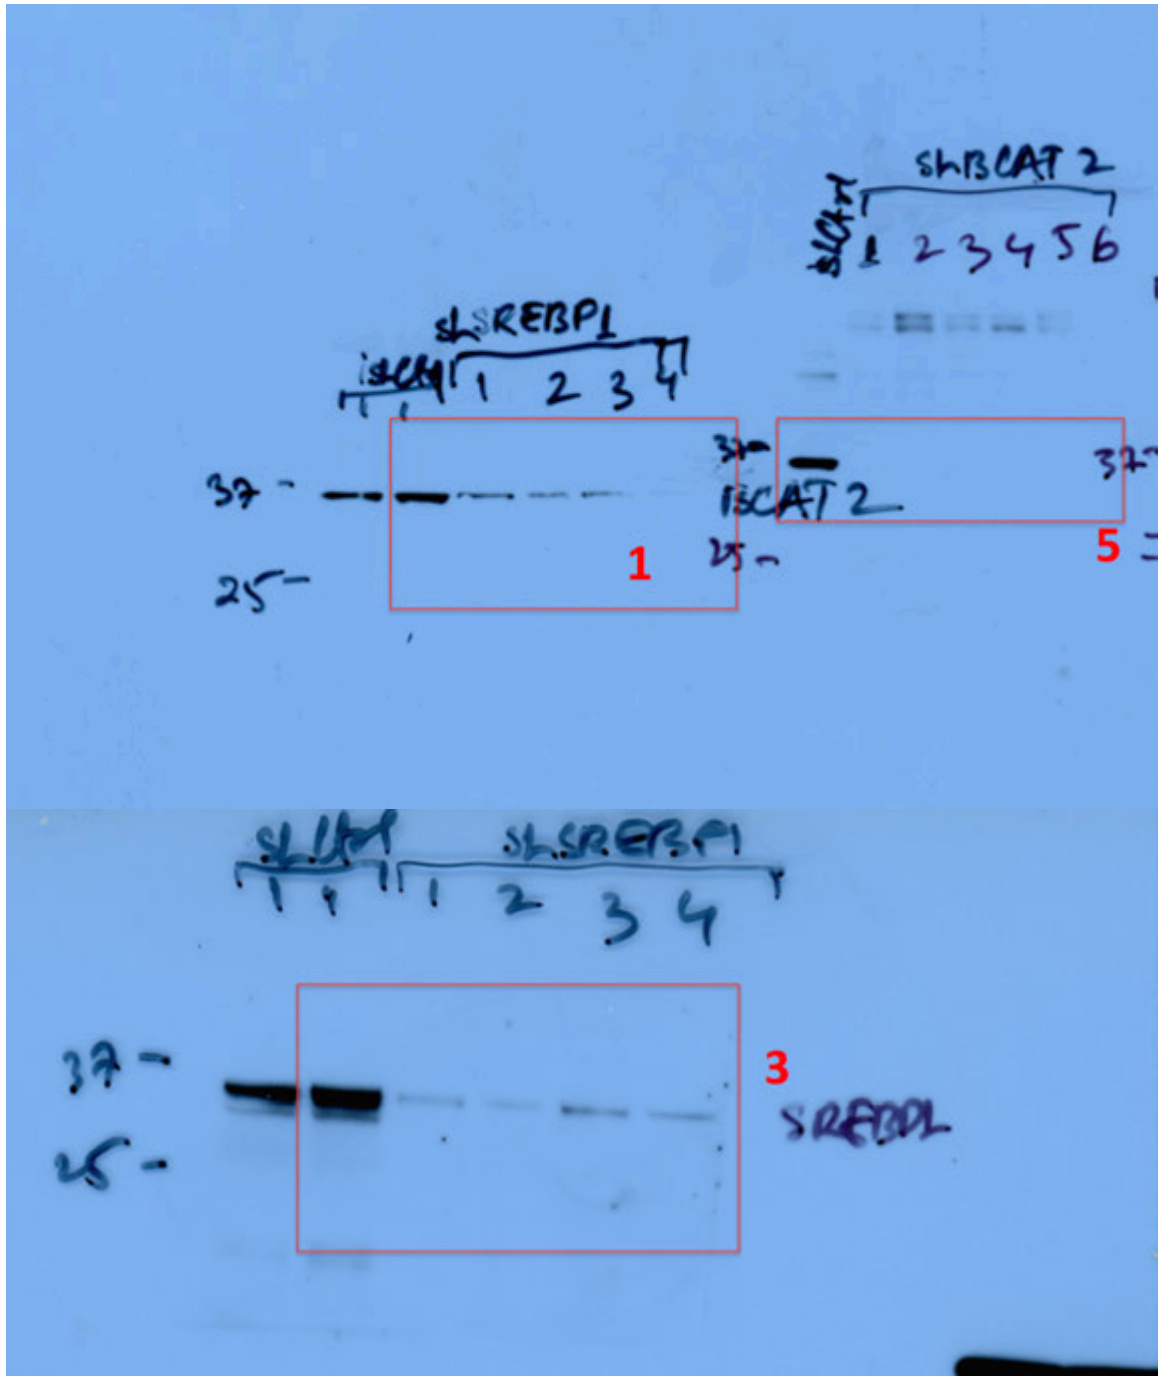

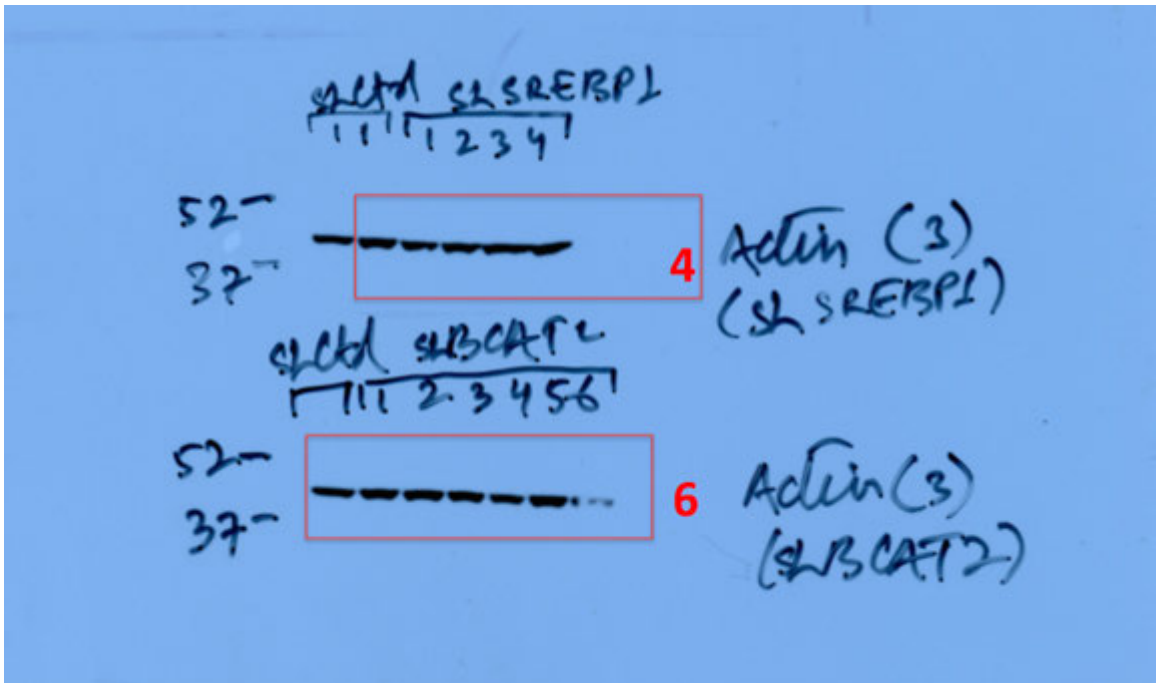

**Supplementary Figure 8:** Un-cropped immunoblot scans for Fig 4g. Raw film scans with red box indicating the area shown in the display. Numbers in red indicates the panel (numbered from top to down) in the figure.



# Supplementary Figure 9

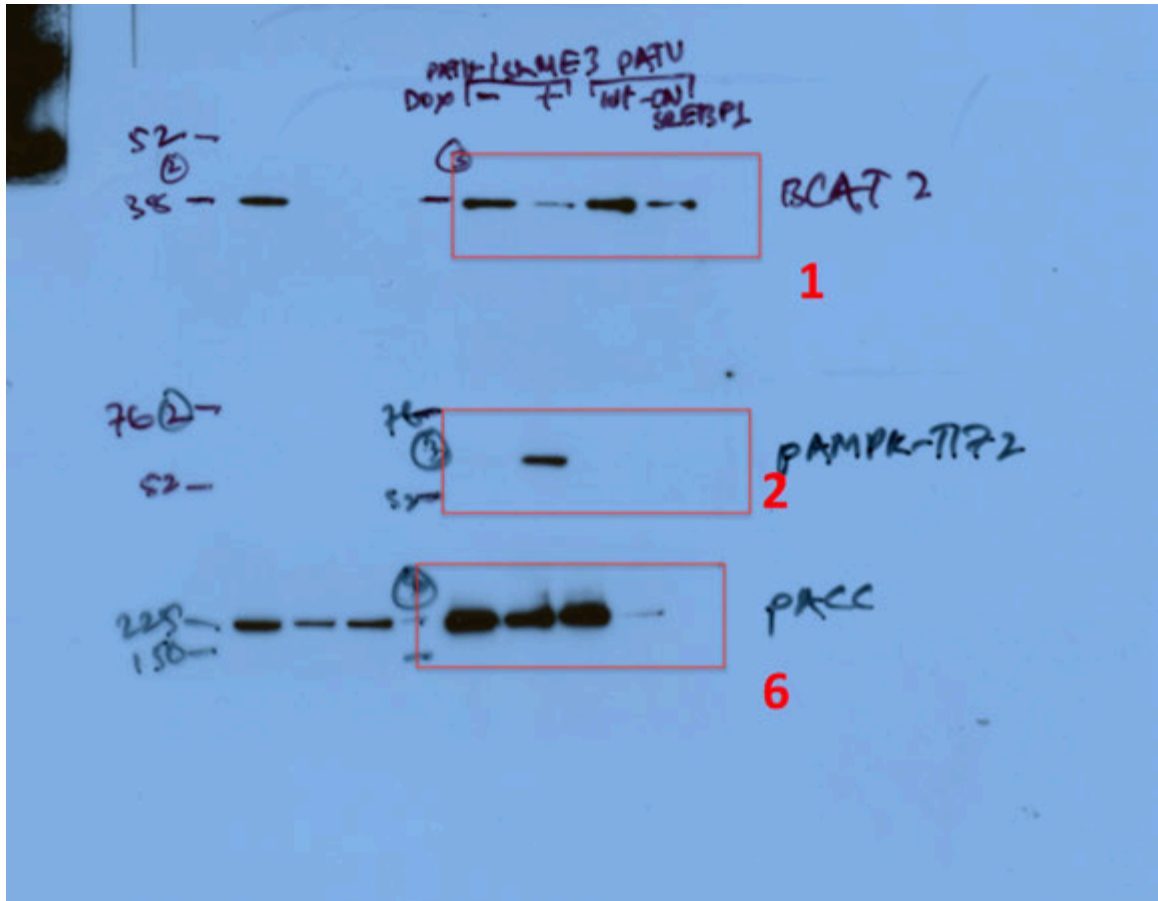

52-  
38-  
52-  
38-  
1 BCAT2

760-  
52-

225-  
158-  
PACC

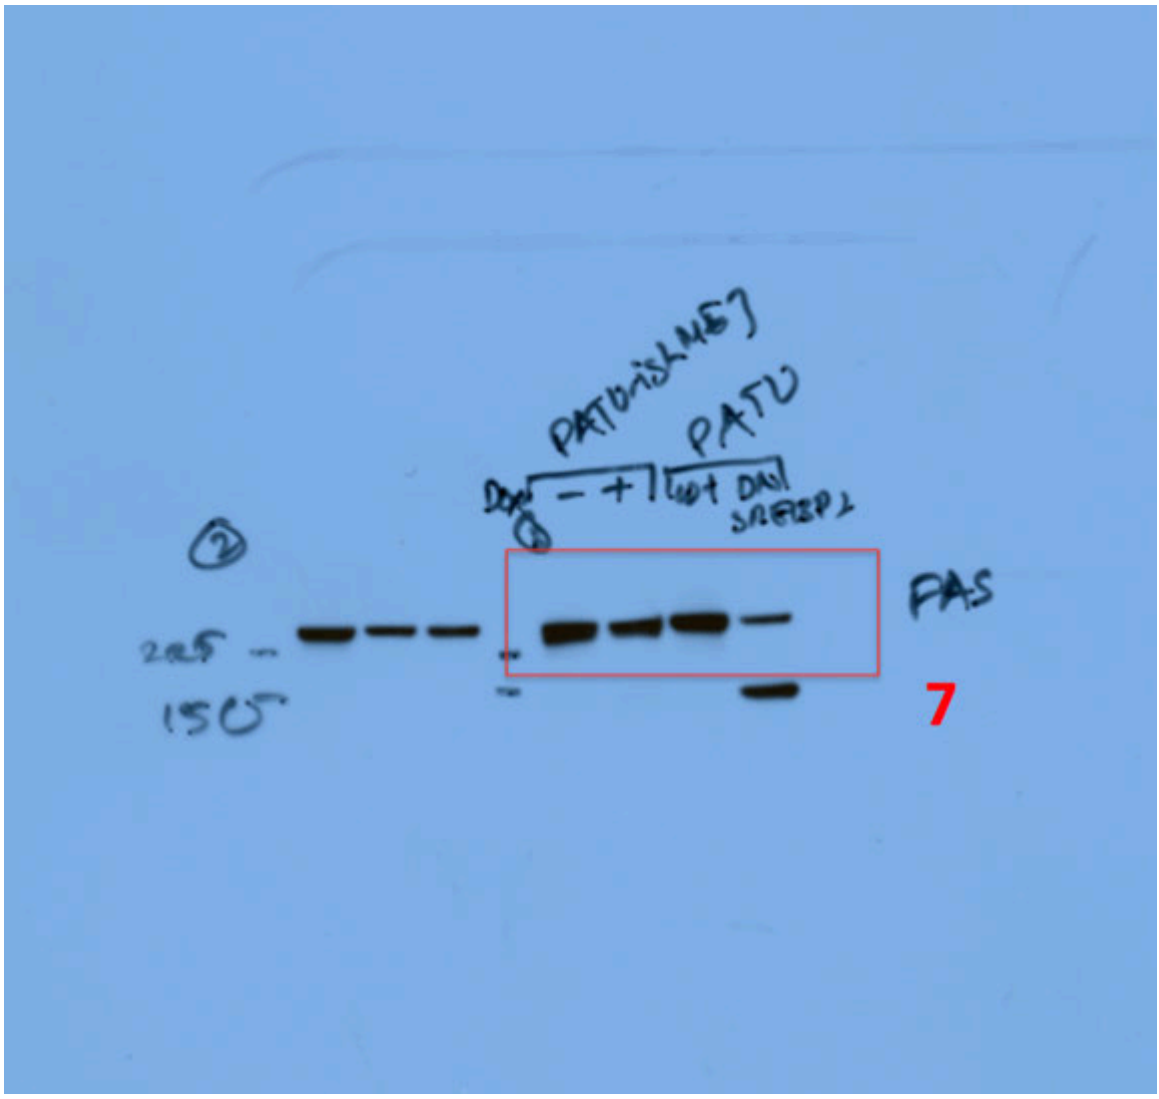

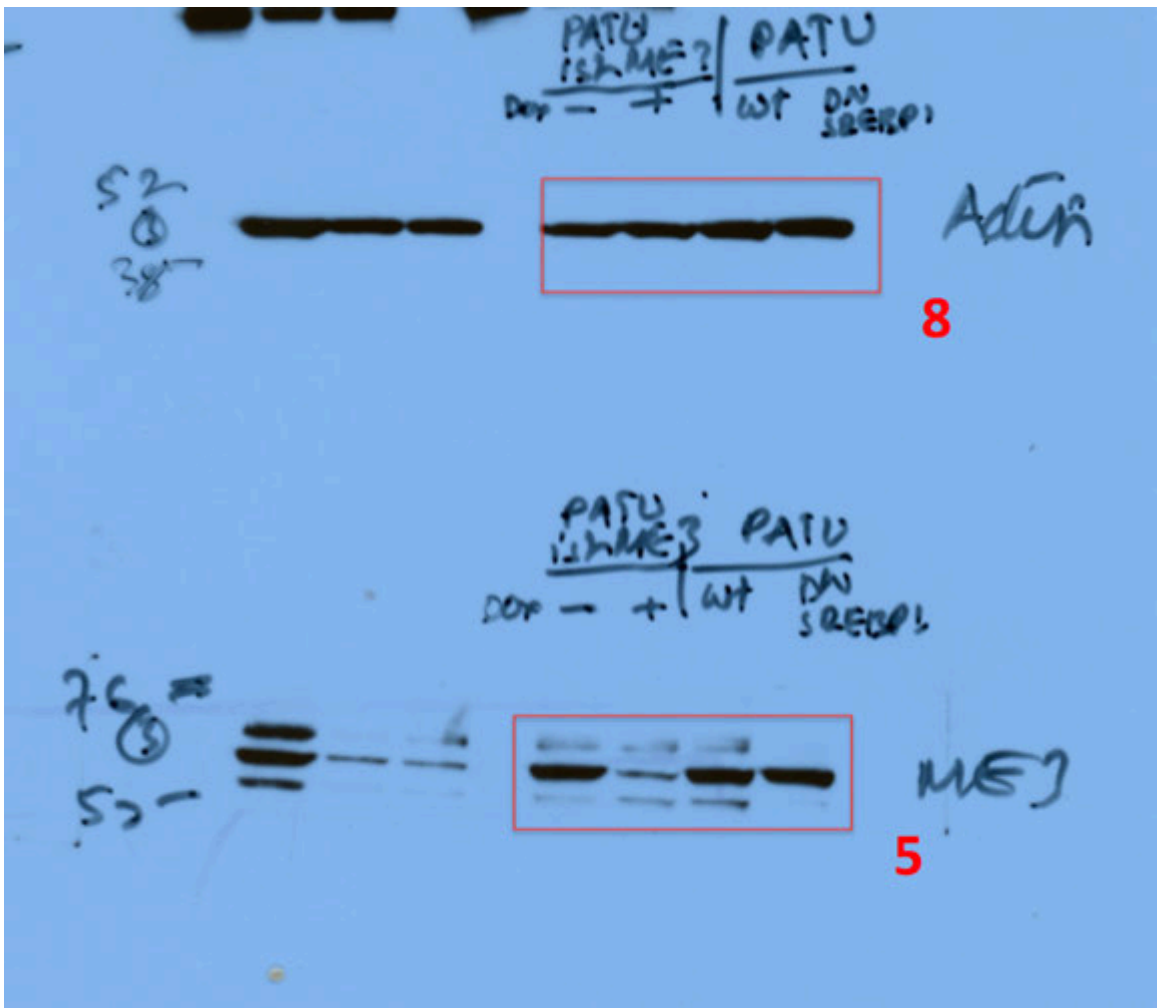

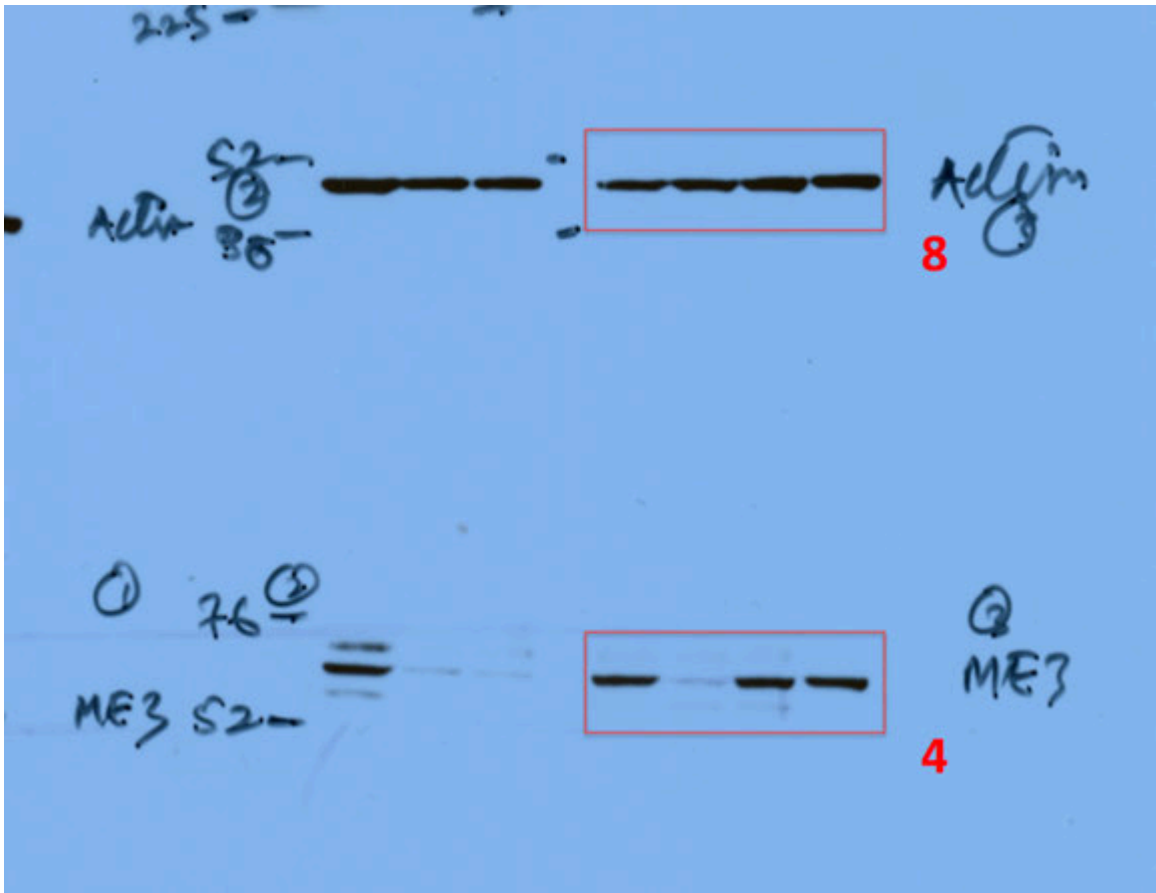

**Supplementary Figure 9:** Un-cropped immunoblot scans for **Fig 4i**. Raw film scans with red box indicating the area shown in the display. Numbers in red indicates the panel (numbered from top to down) in the figure.

## Supplementary Figure 10

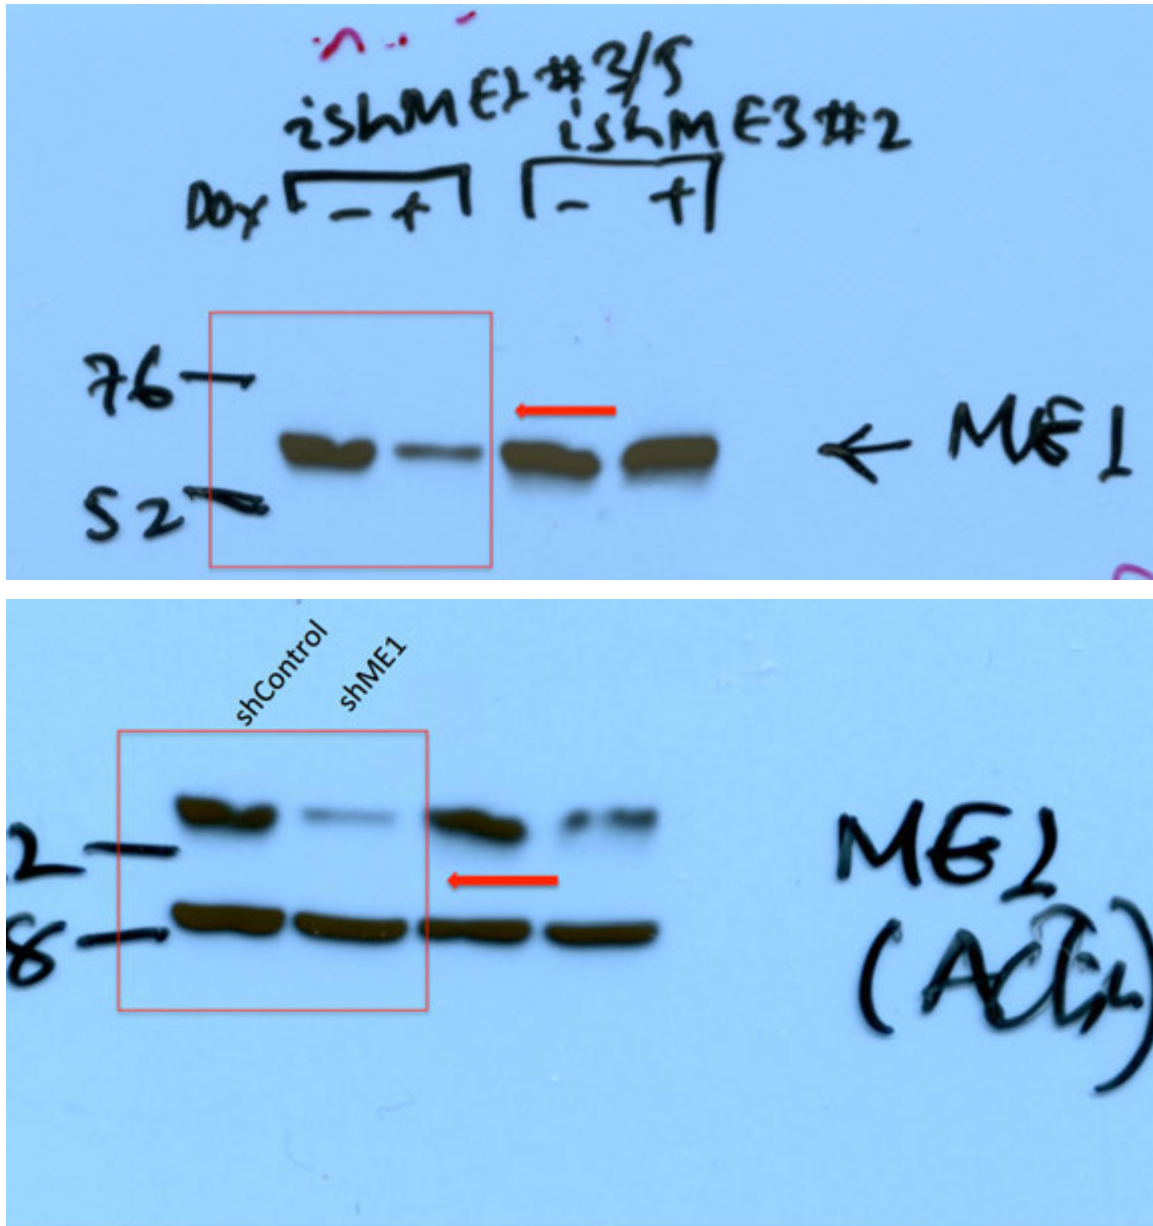

**Supplementary Figure 10:** Un-cropped immunoblot scans for **Extended Fig 2c**. Raw film scans with red box indicating the area shown in the display. Numbers in red indicates the panel (numbered from top to down) in the figure.

# Supplementary Figure 11

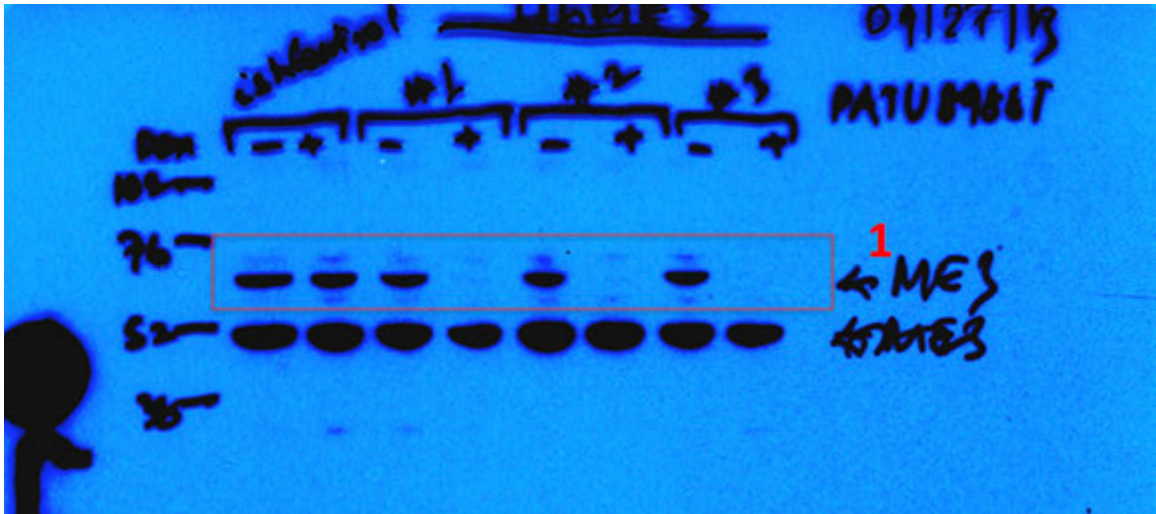

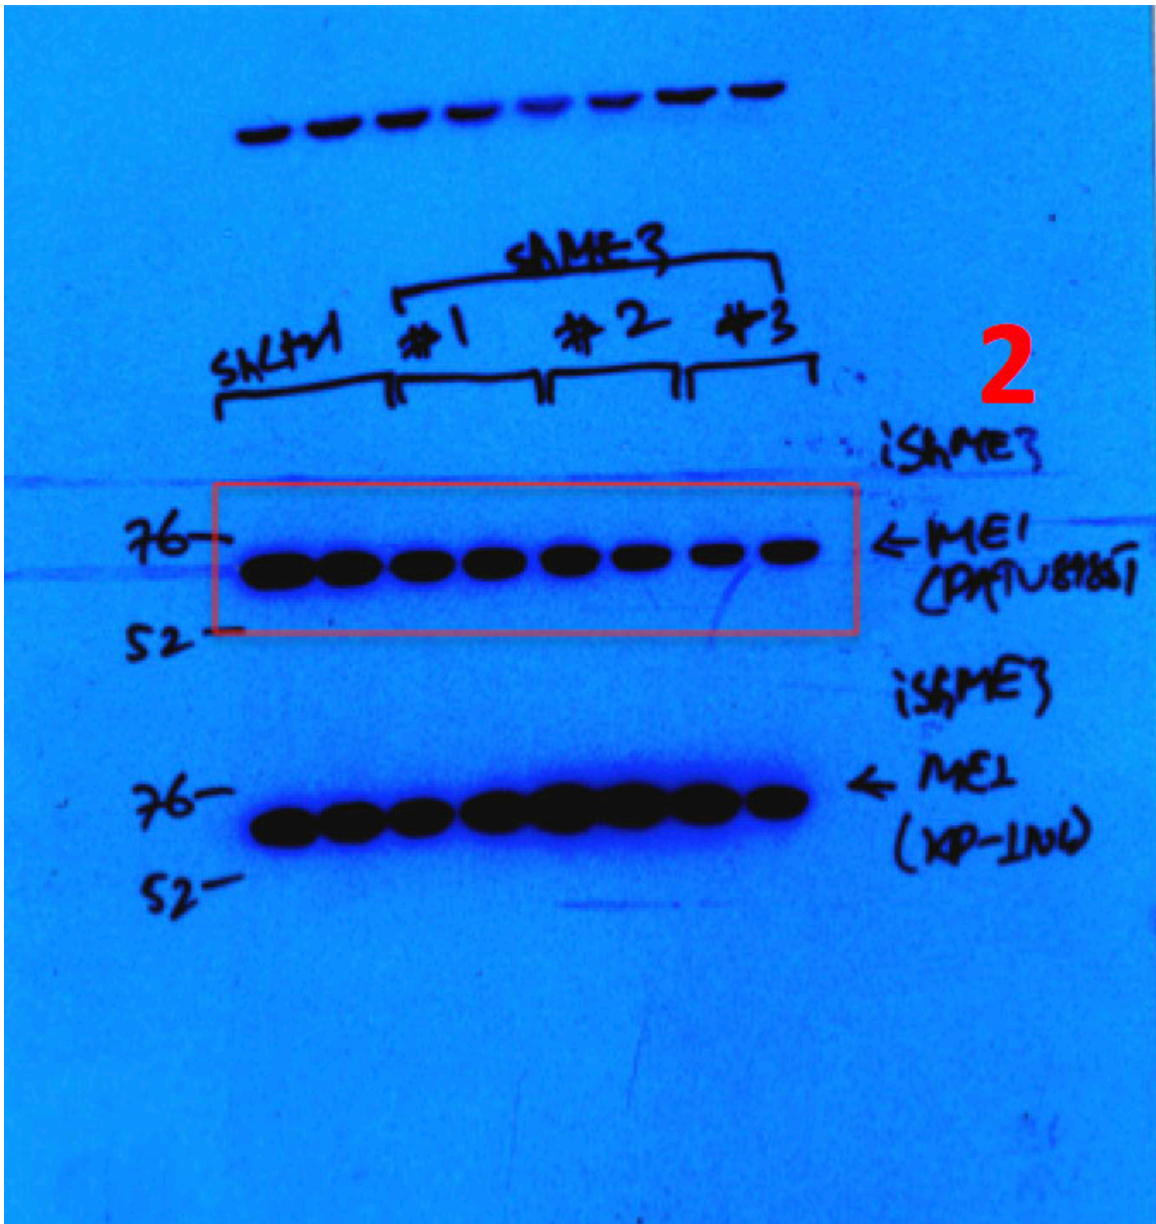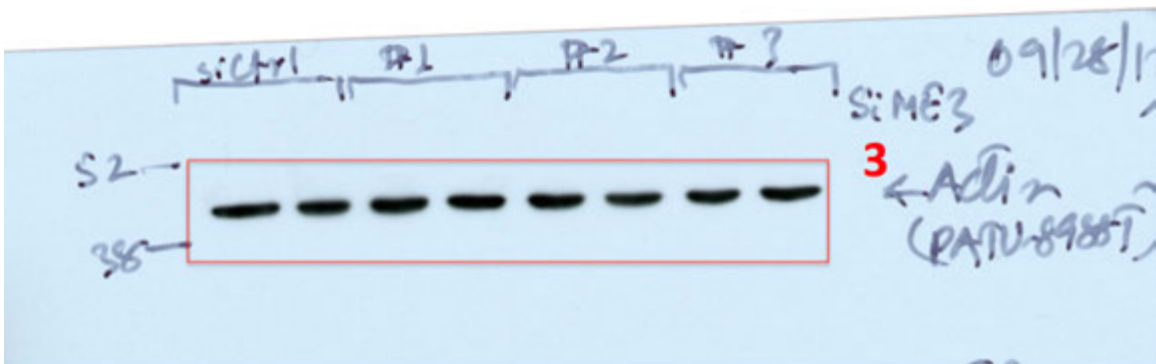



**Supplementary Figure 11:** Un-cropped immunoblot scans for **Extended Fig 3a**. Raw film scans with red box indicating the area shown in the display. Numbers in red indicates the panel (numbered from top to down) in the figure.

# Supplementary Figure 12

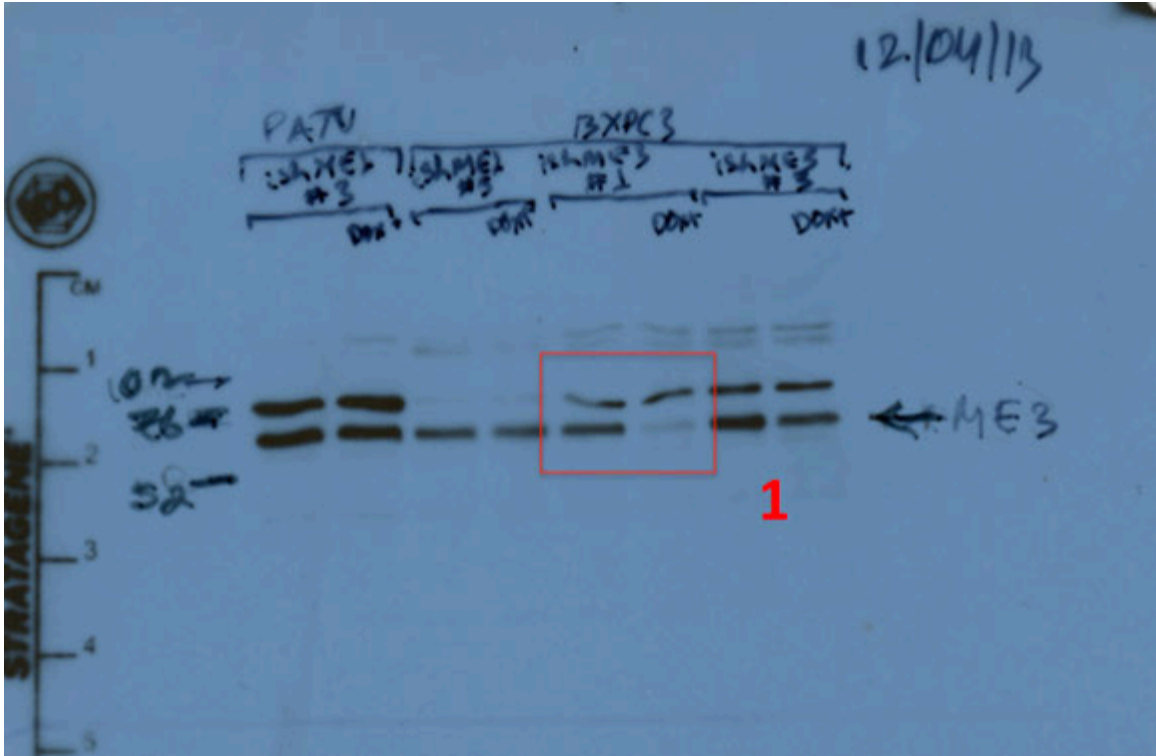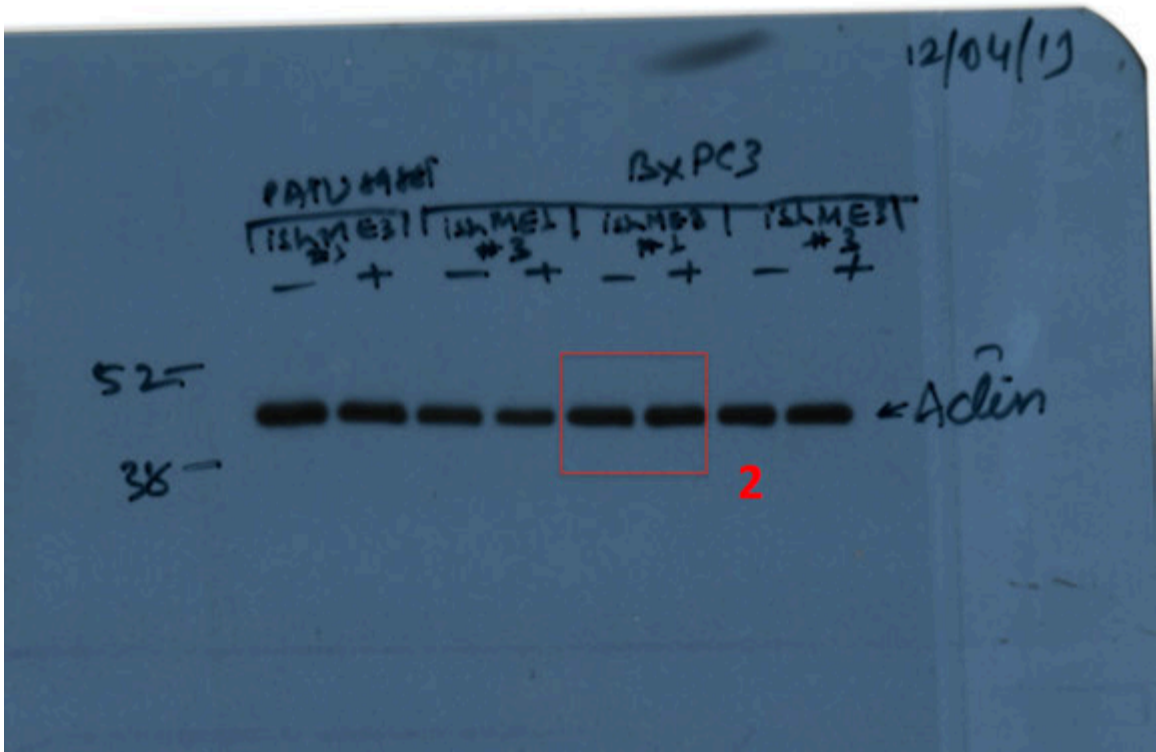

**Supplementary Figure 12:** Un-cropped immunoblot scans for **Extended Fig 3b**. Raw film scans with red box indicating the area shown in the display. Numbers in red indicates the panel (numbered from top to down) in the figure.

# Supplementary Figure 13

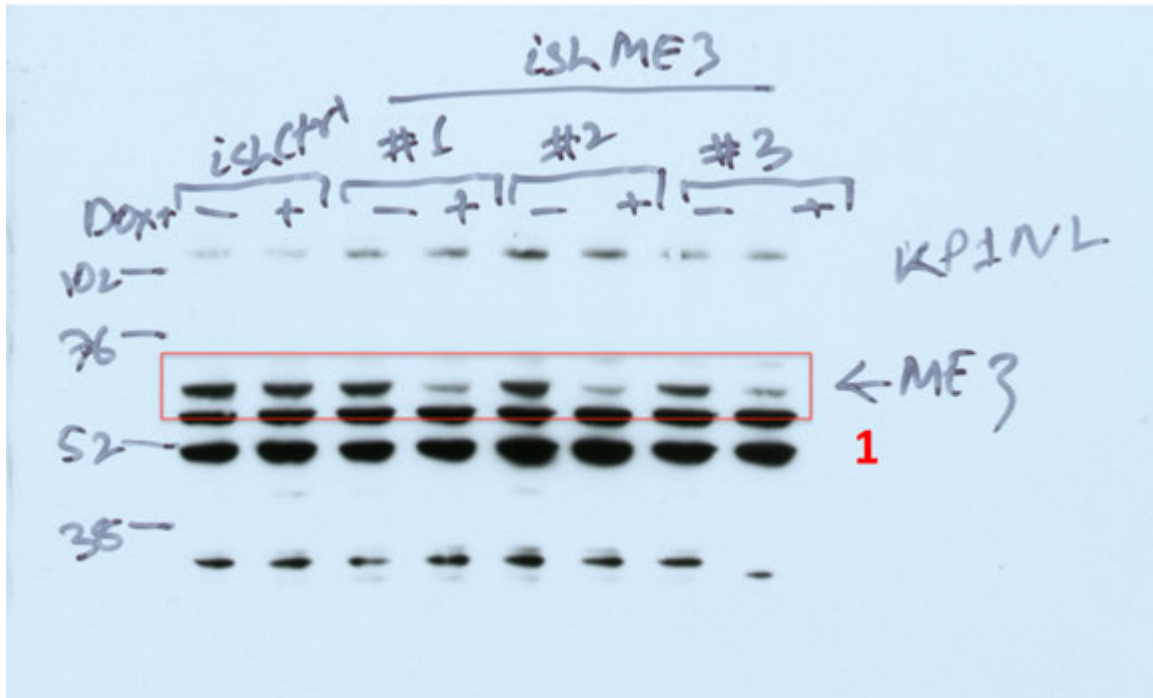

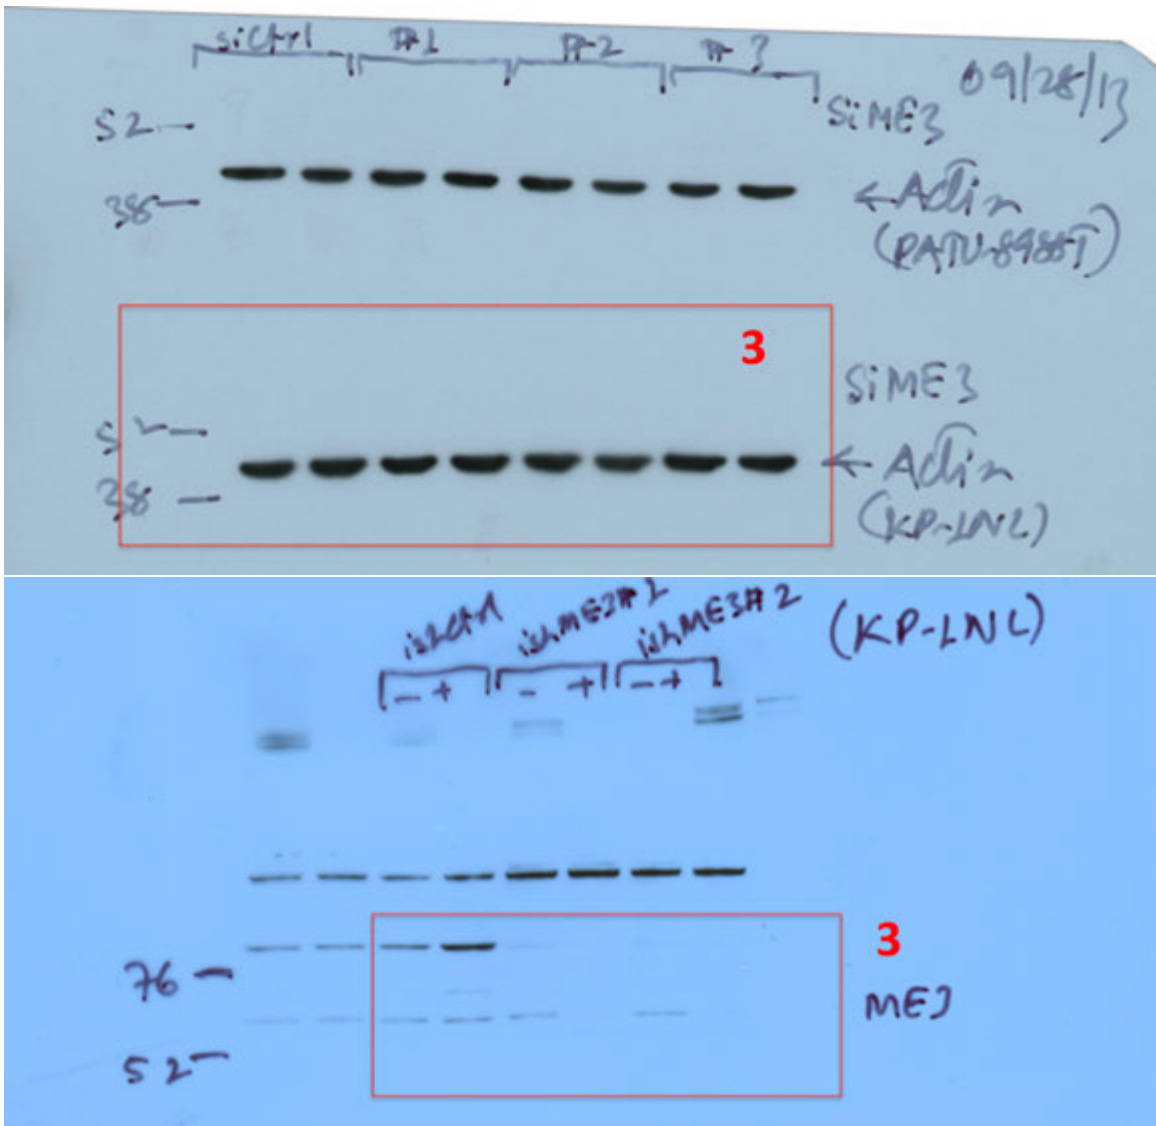

**Supplementary Figure 13:** Un-cropped immunoblot scans for **Extended Fig 3c**. Raw film scans with red box indicating the area shown in the display. Numbers in red indicates the panel (numbered from top to down) in the figure.

# Supplementary Figure 14

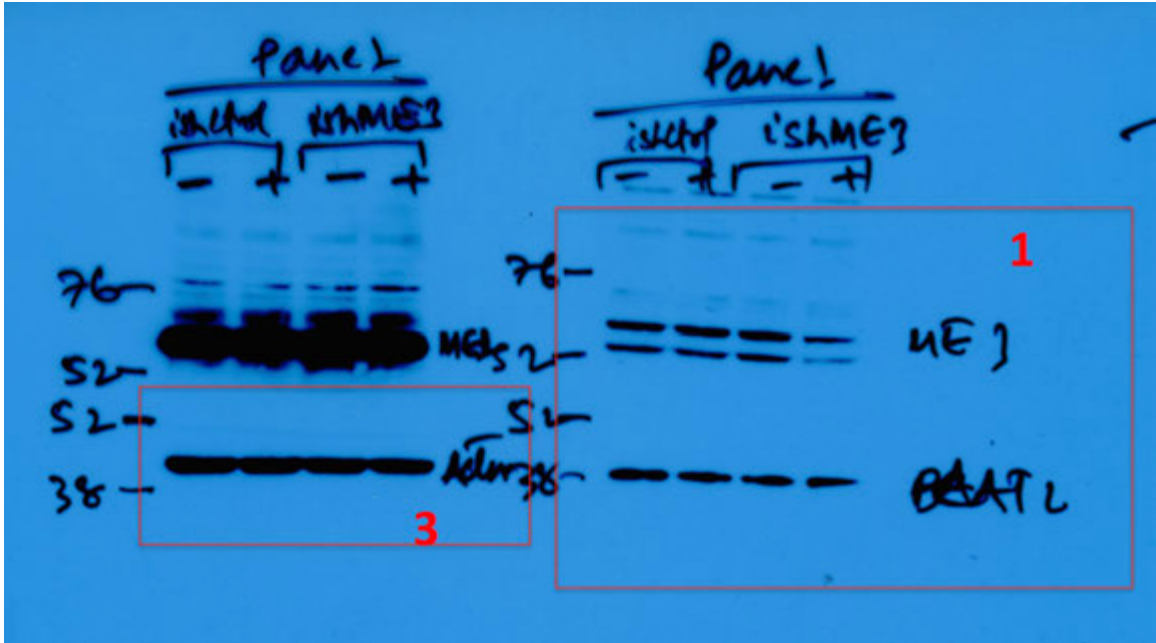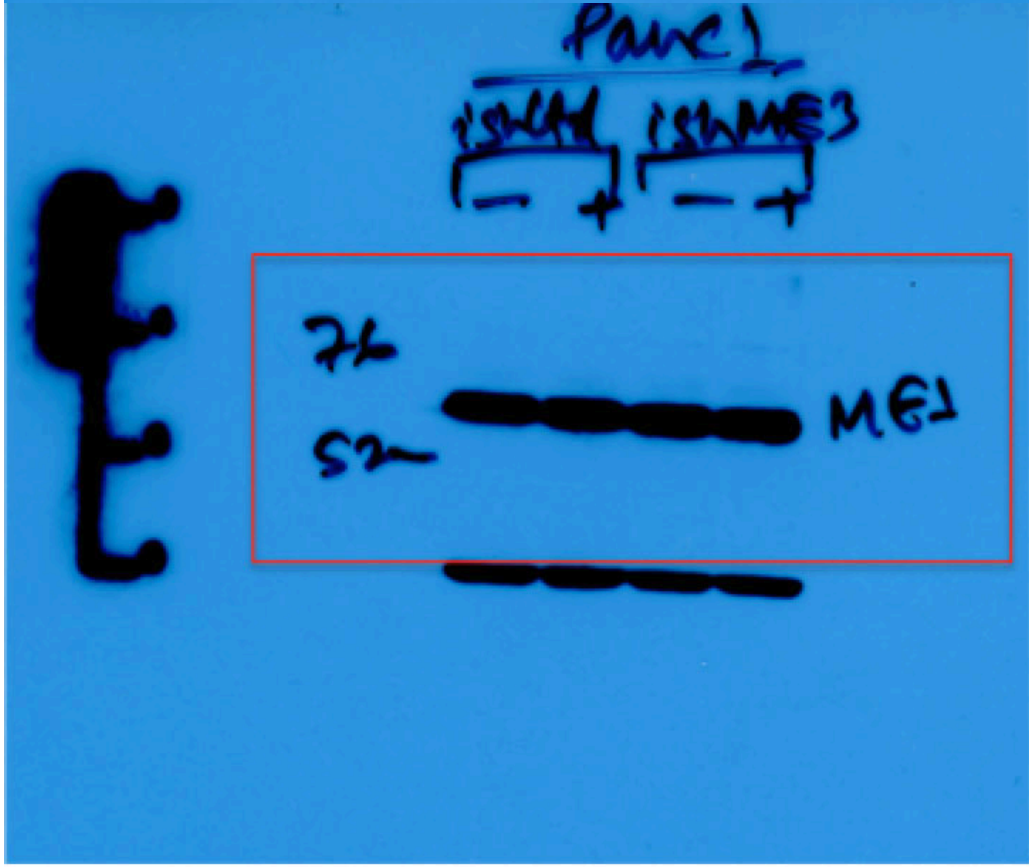

**Supplementary Figure 14:** Un-cropped immunoblot scans for **Extended Fig 3d**. Raw film scans with red box indicating the area shown in the display. Numbers in red indicates the panel (numbered from top to down) in the figure.

# Supplementary Figure 15

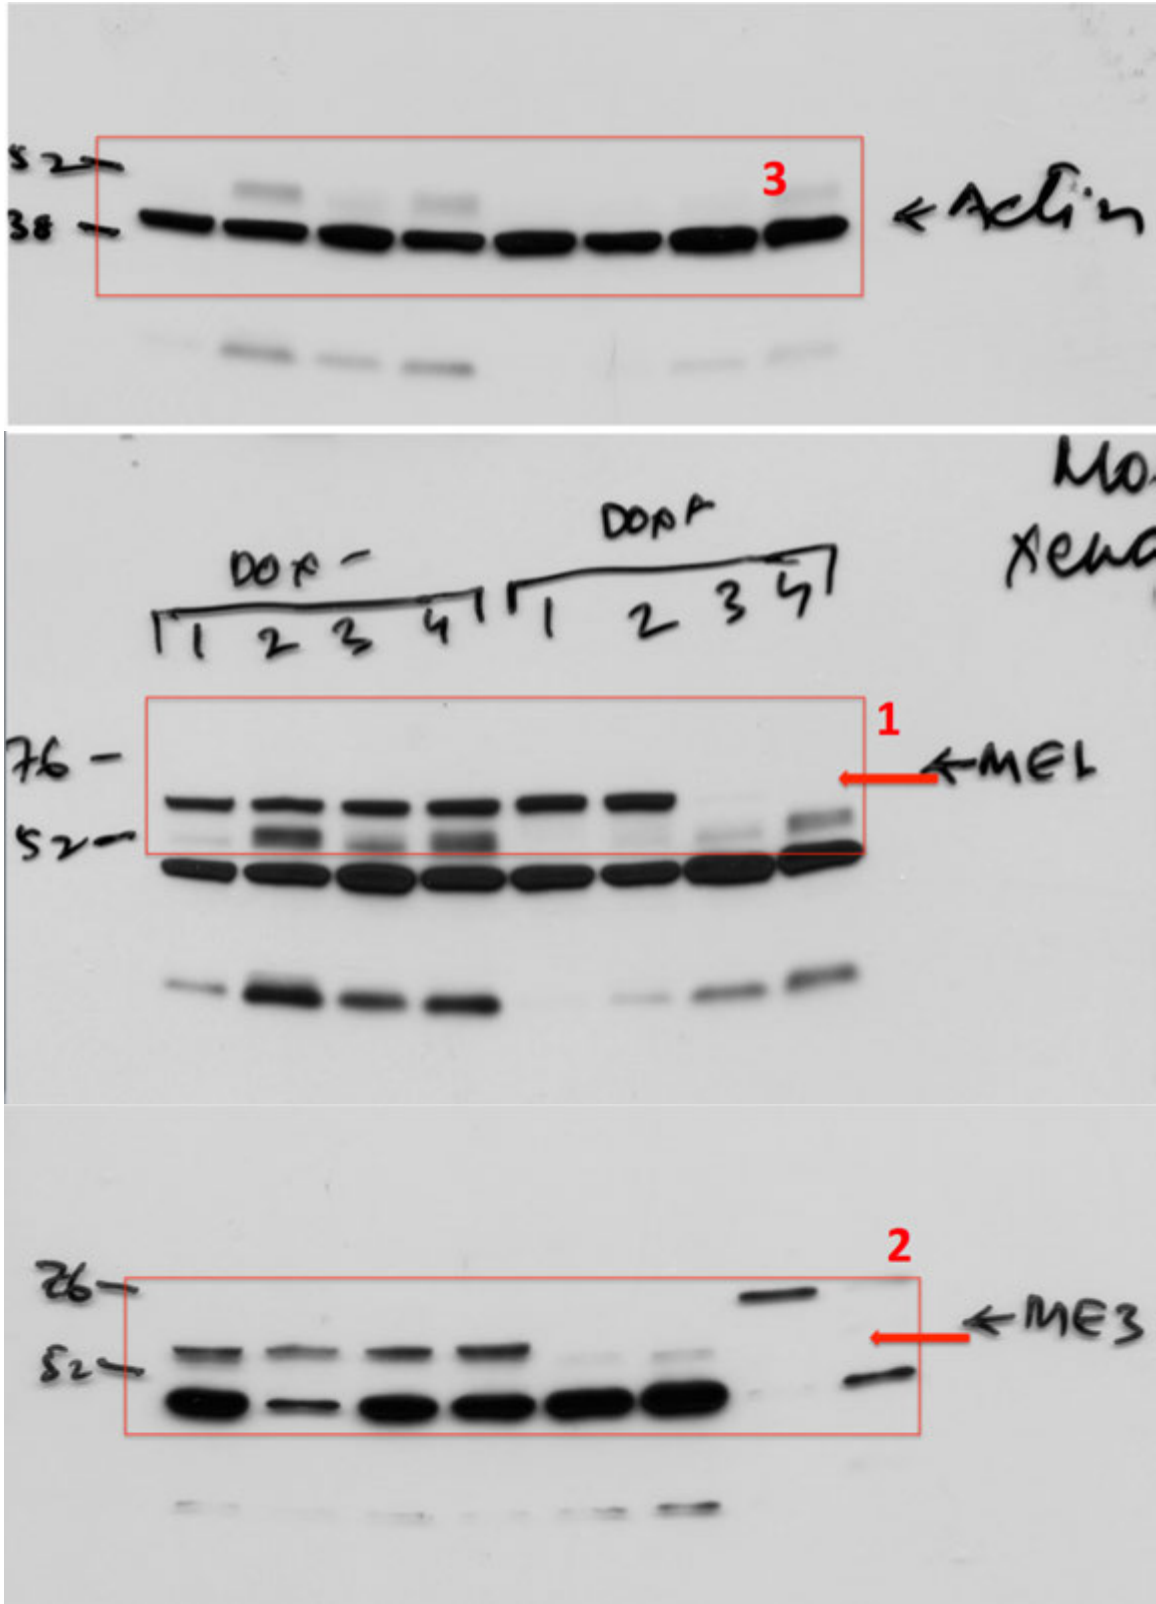



**Supplementary Figure 15:** Un-cropped immunoblot scans for **Extended Fig 3k**. Raw film scans with red box indicating the area shown in the display. Numbers in red indicates the panel (numbered from top to down) in the figure.

Supplementary Figure 16

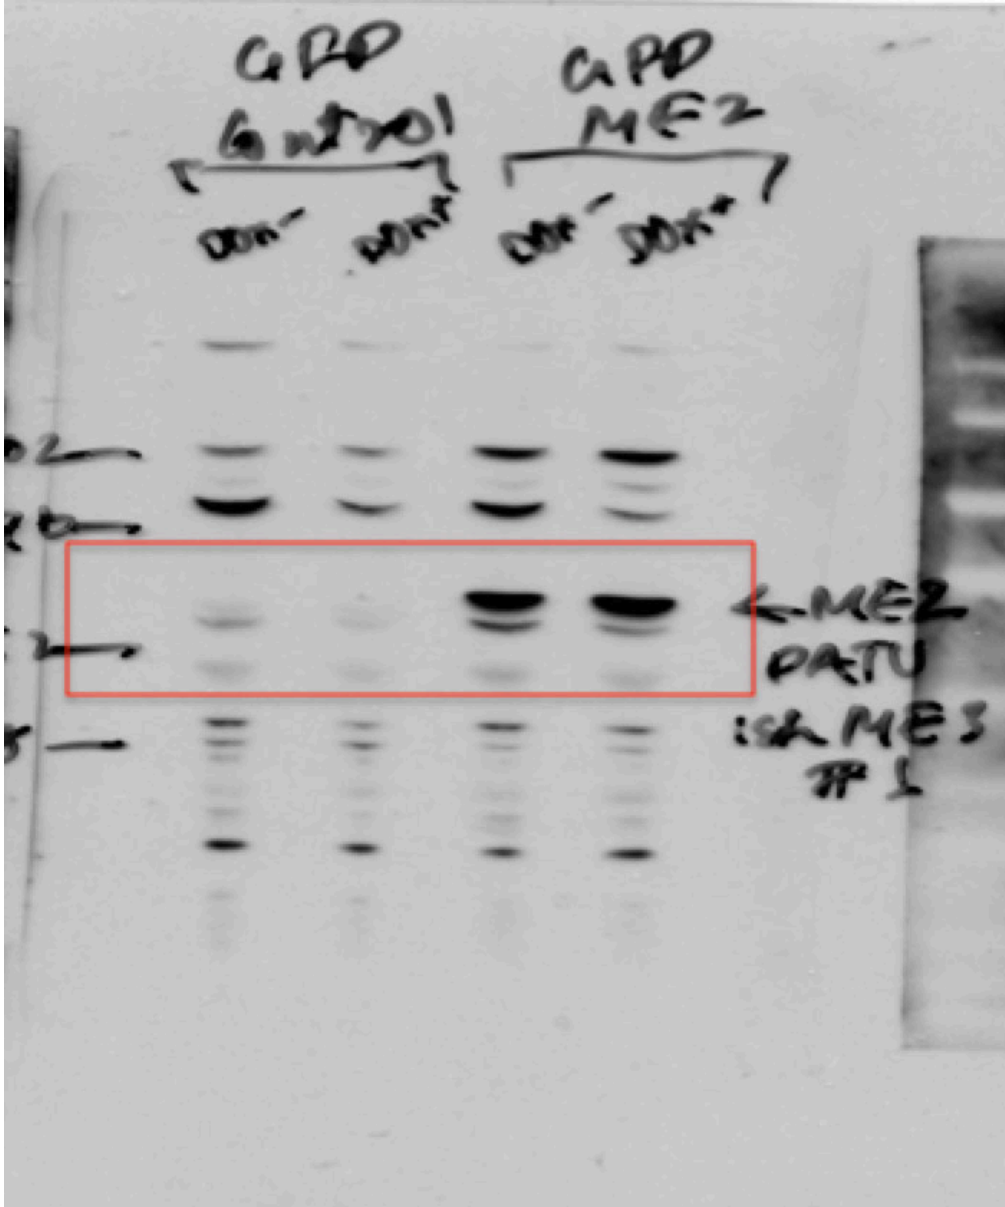

2

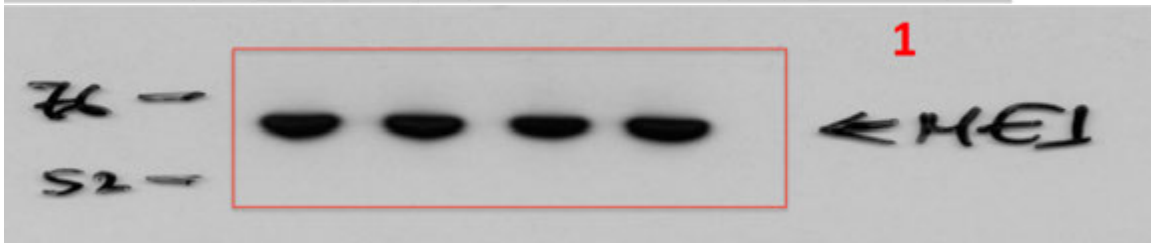

1

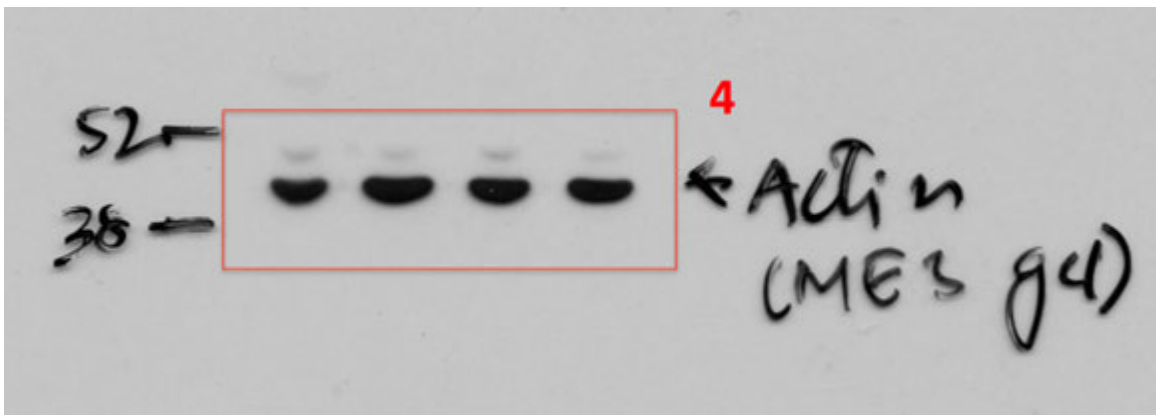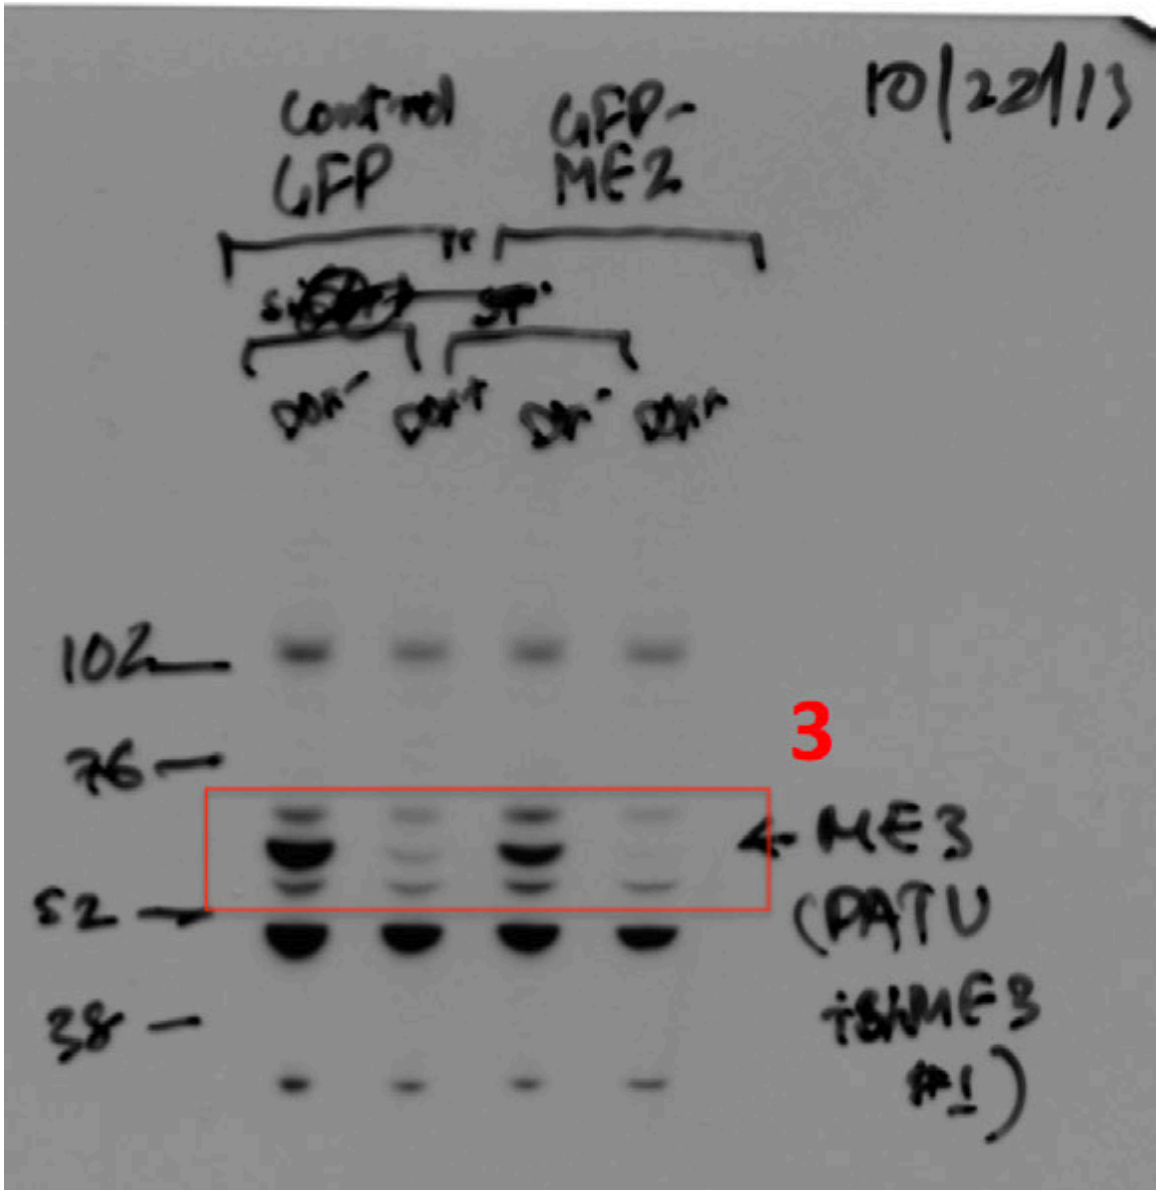

**Supplementary Figure 16:** Un-cropped immunoblot scans for **Extended Fig 5c**. Raw film scans with red box indicating the area shown in the display. Numbers in red indicates the panel (numbered from top to down) in the figure.

# Supplementary Figure 17

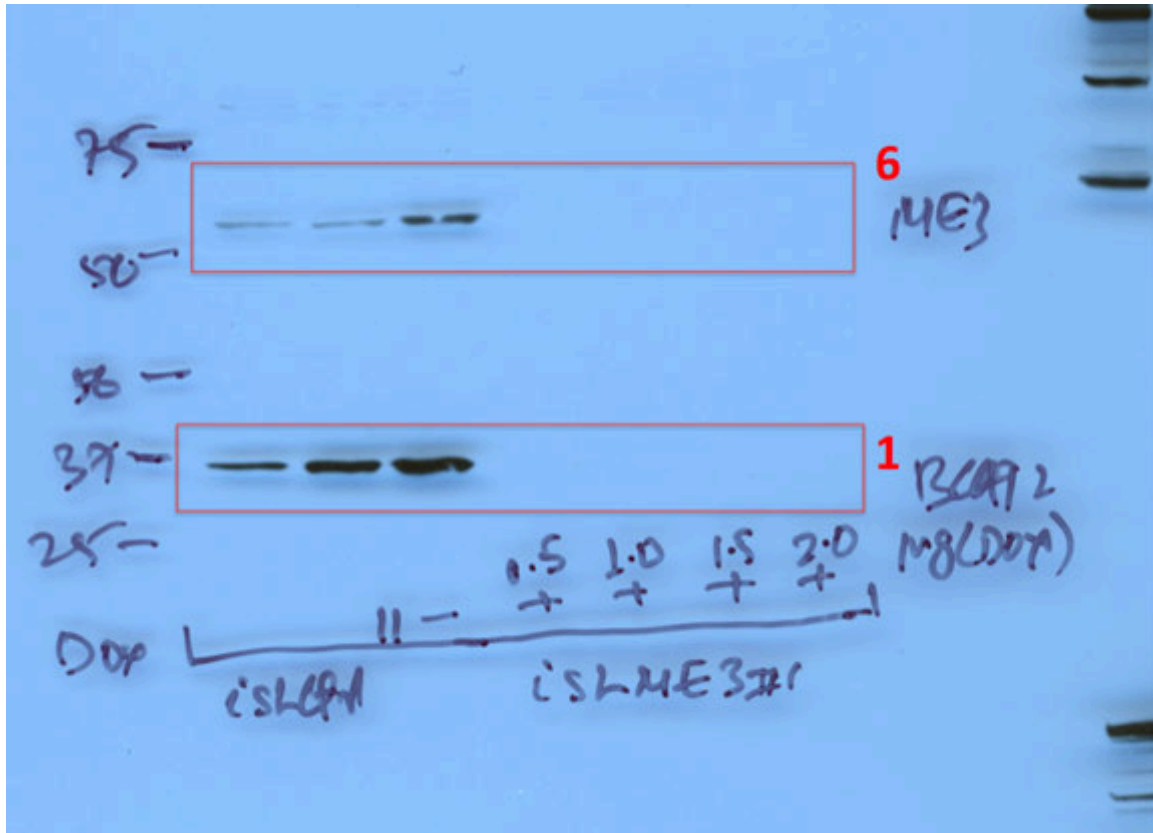

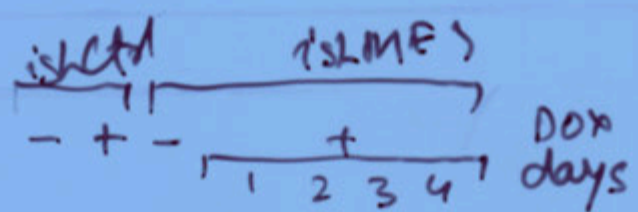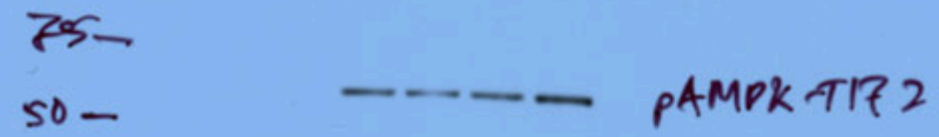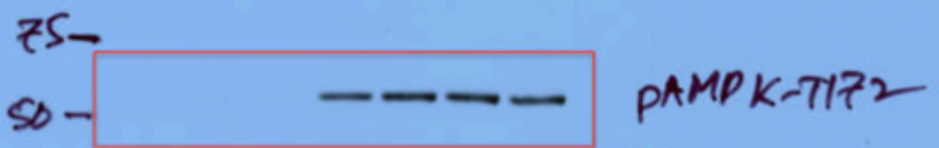

3

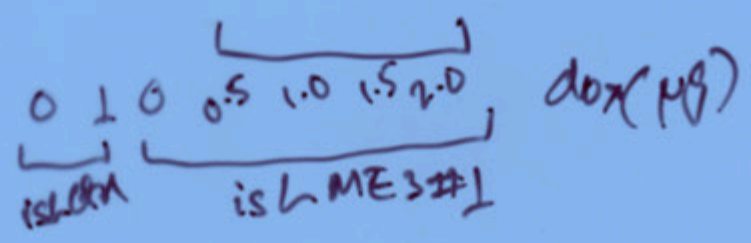

ishcpd ishME3  
- + - +  
1 2 3 4  
day days

75 =  
50 - PAMPK-T172

75 -  
50 - PAMPK-T172

4

0 1 0 0.5 1.0 1.5 2.0  
ishcpd ishME3  
day (ng)

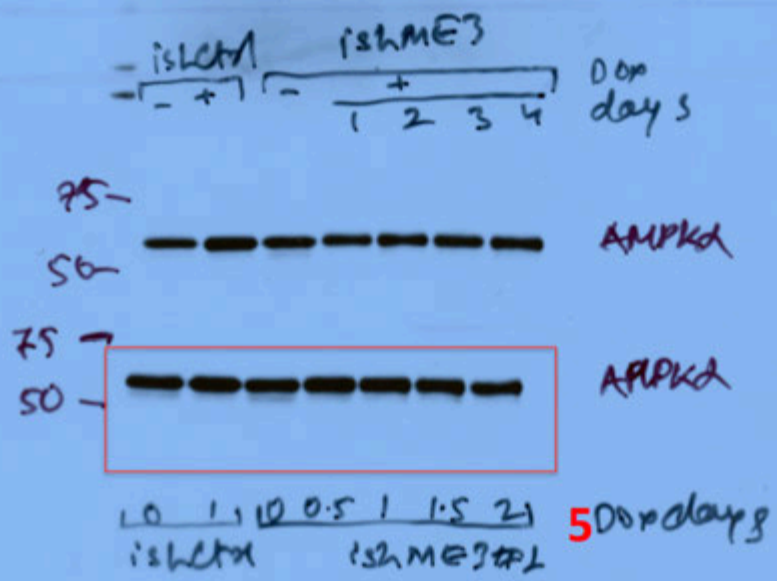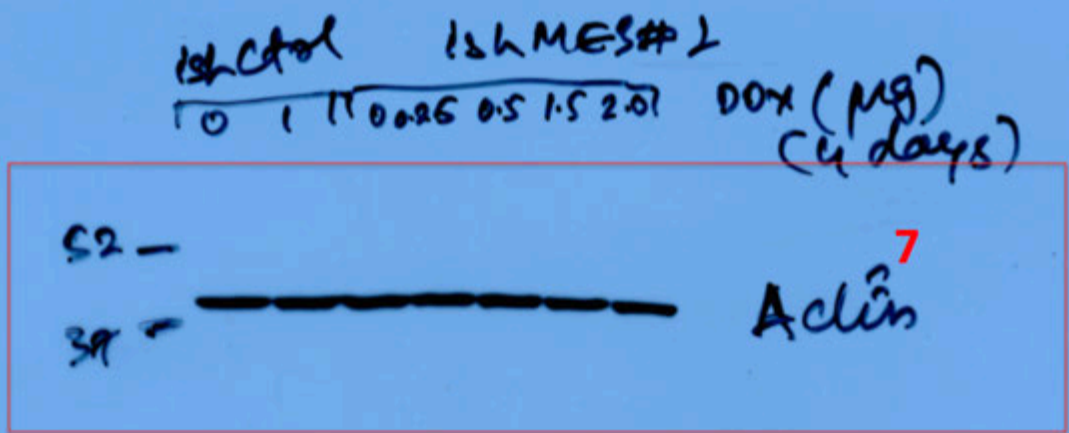



**Supplementary Figure 17: Un-cropped immunoblot scans for Extended Fig 8b.**

Raw film scans with red box indicating the area shown in the display.

Numbers in red indicates the panel (numbered from top to down) in the figure.

## Supplementary Figure 18

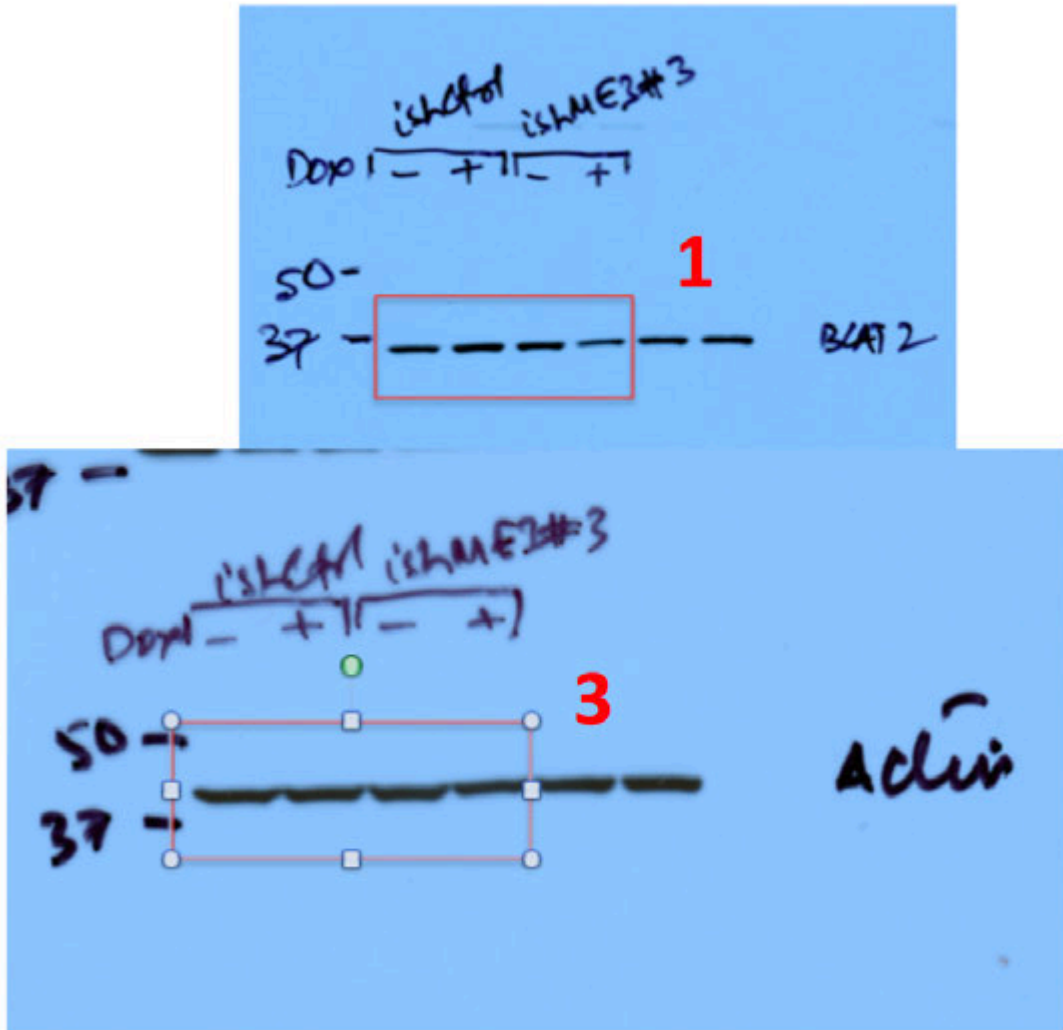

**Supplementary Figure 18:** Un-cropped immunoblot scans for **Extended Fig 8c**. Raw film scans with red box indicating the area shown in the display. Numbers in red indicates the panel (numbered from top to down) in the figure.

## Supplementary Figure 19

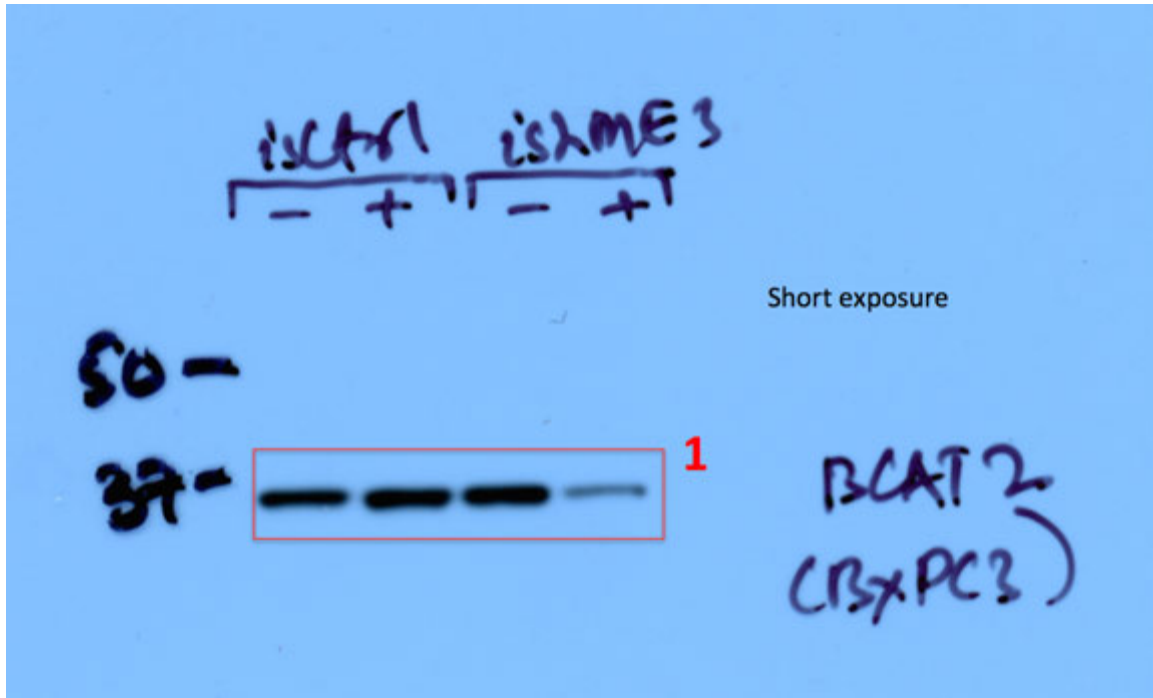

BxPC3  
i2hctrl i2hME3  
- + - +

75

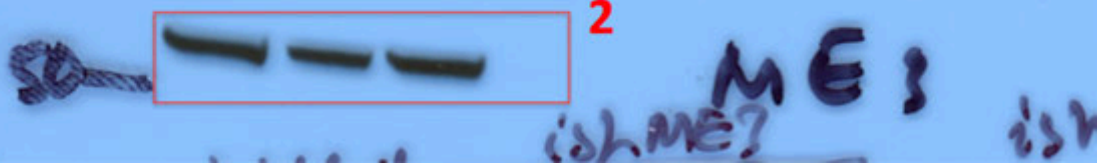

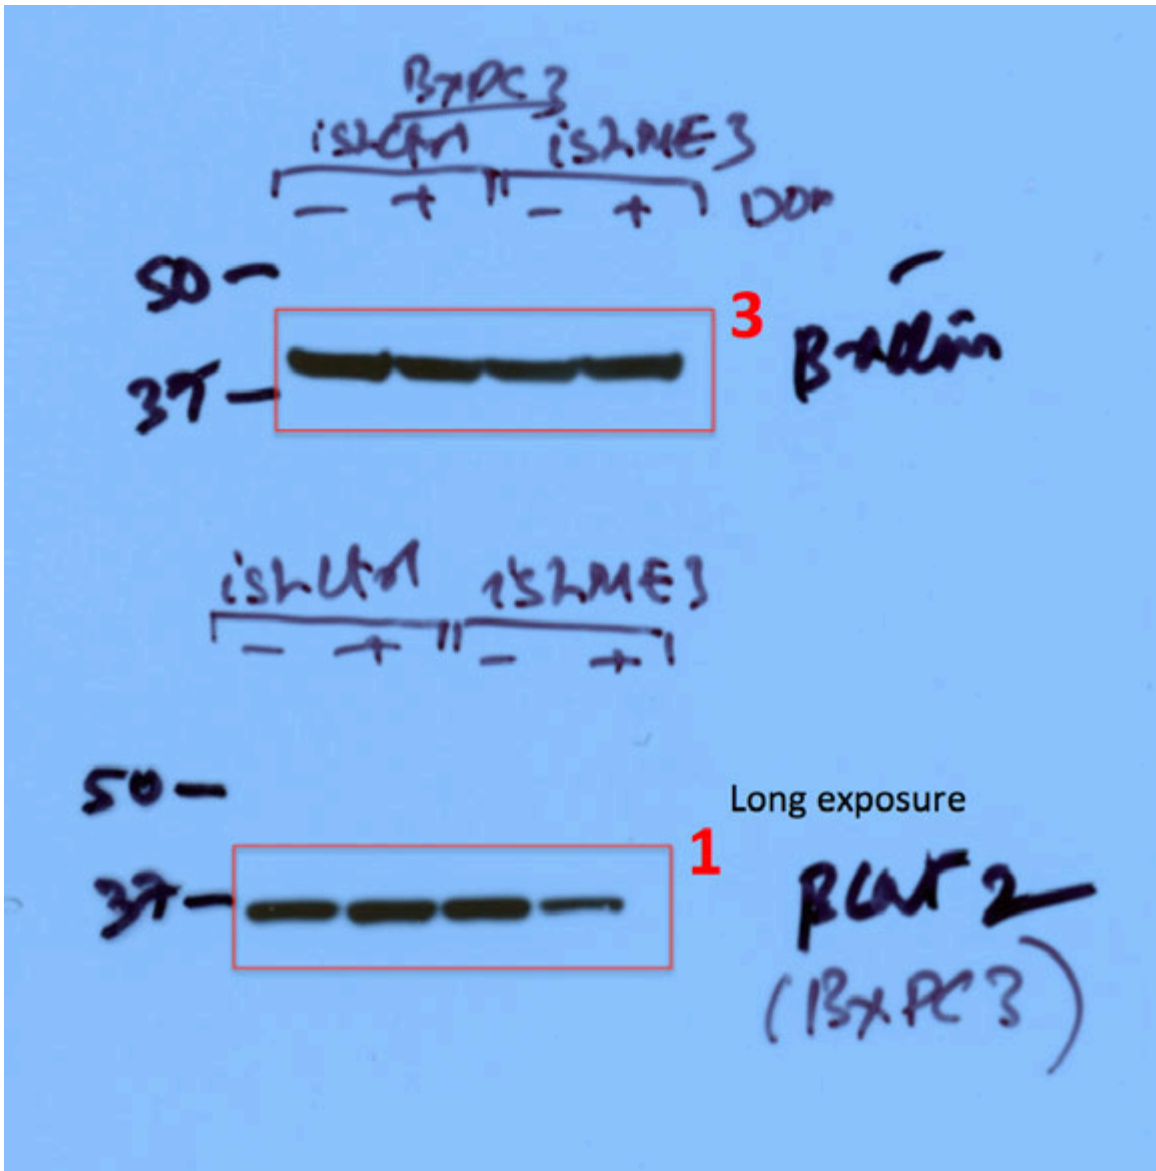

**Supplementary Figure 19:** Un-cropped immunoblot scans for **Extended Fig 8d**. Raw film scans with red box indicating the area shown in the display. Numbers in red indicates the panel (numbered from top to down) in the figure.

## Supplementary Figure 20

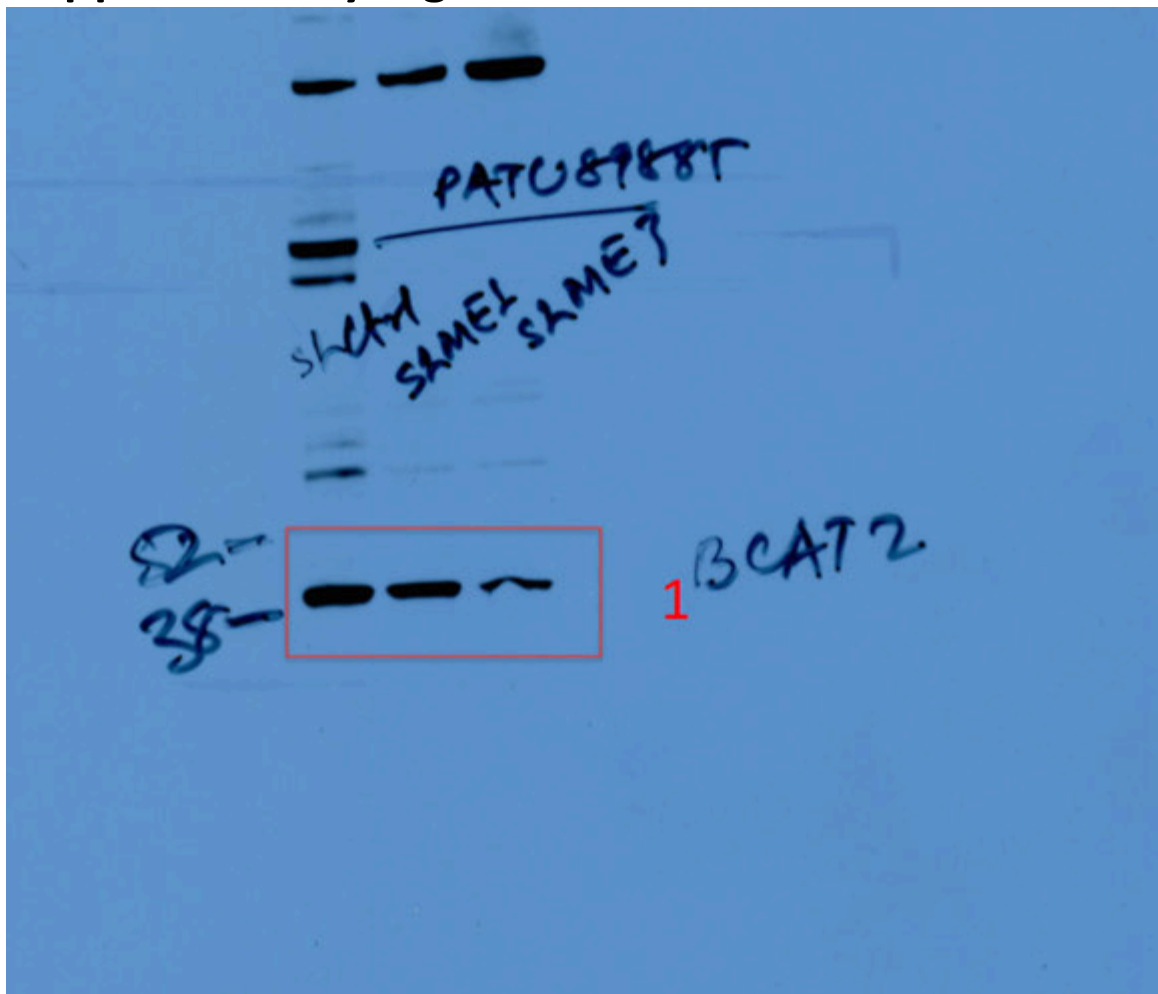

S2M  
S2ME1  
S2ME2

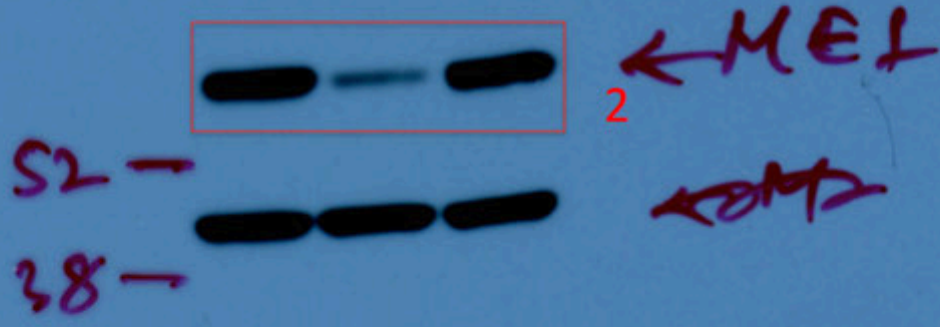

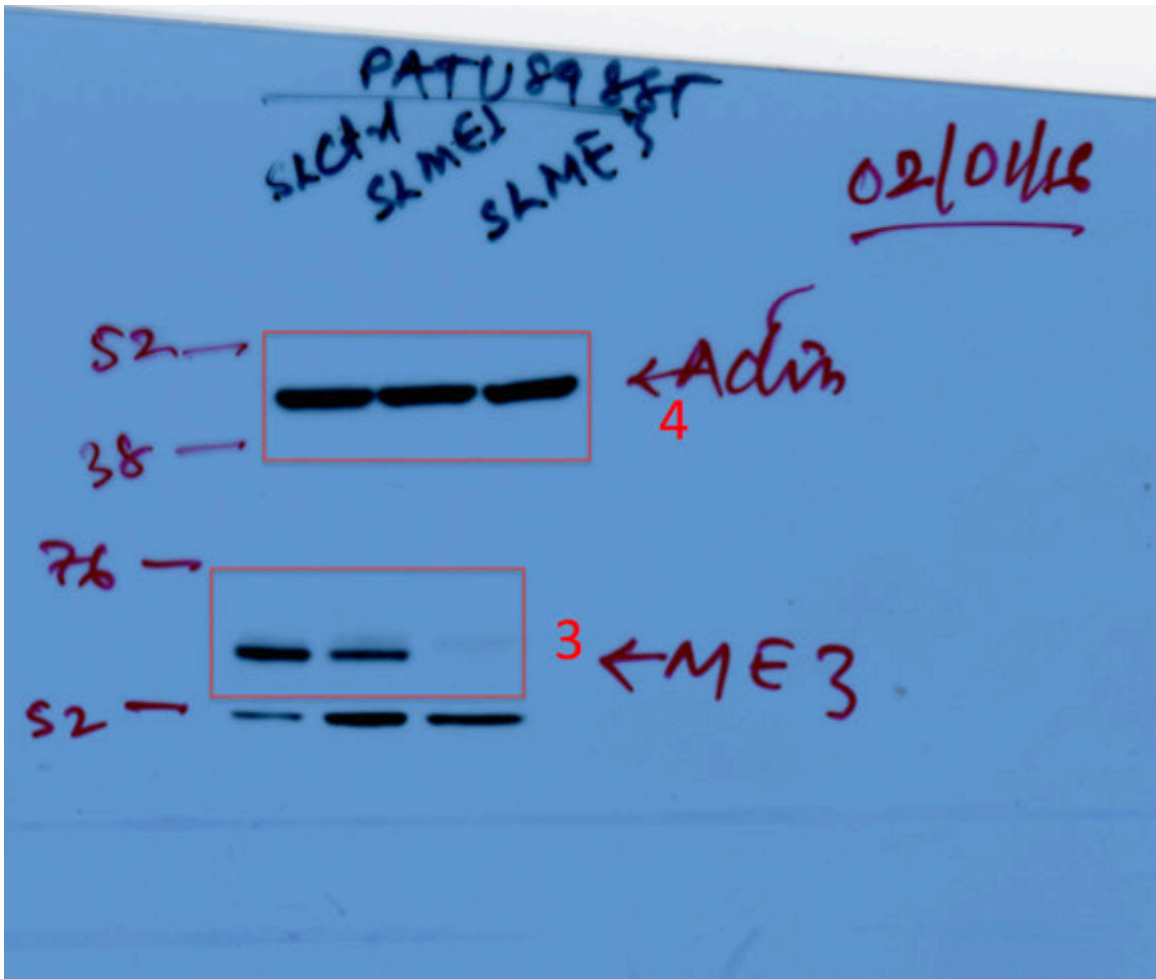

**Supplementary Figure 20:** Un-cropped immunoblot scans for **Extended Fig 8e**. Raw film scans with red box indicating the area shown in the display. Numbers in red indicates the panel (numbered from top to down) in the figure.



# Supplementary Figure 21

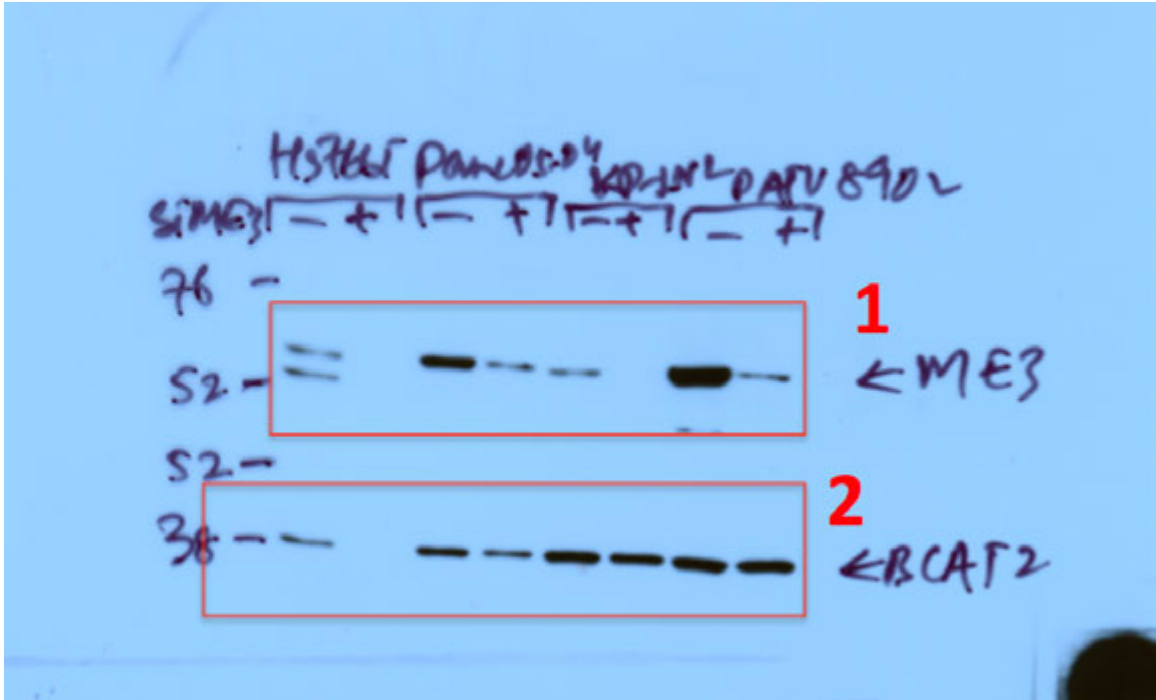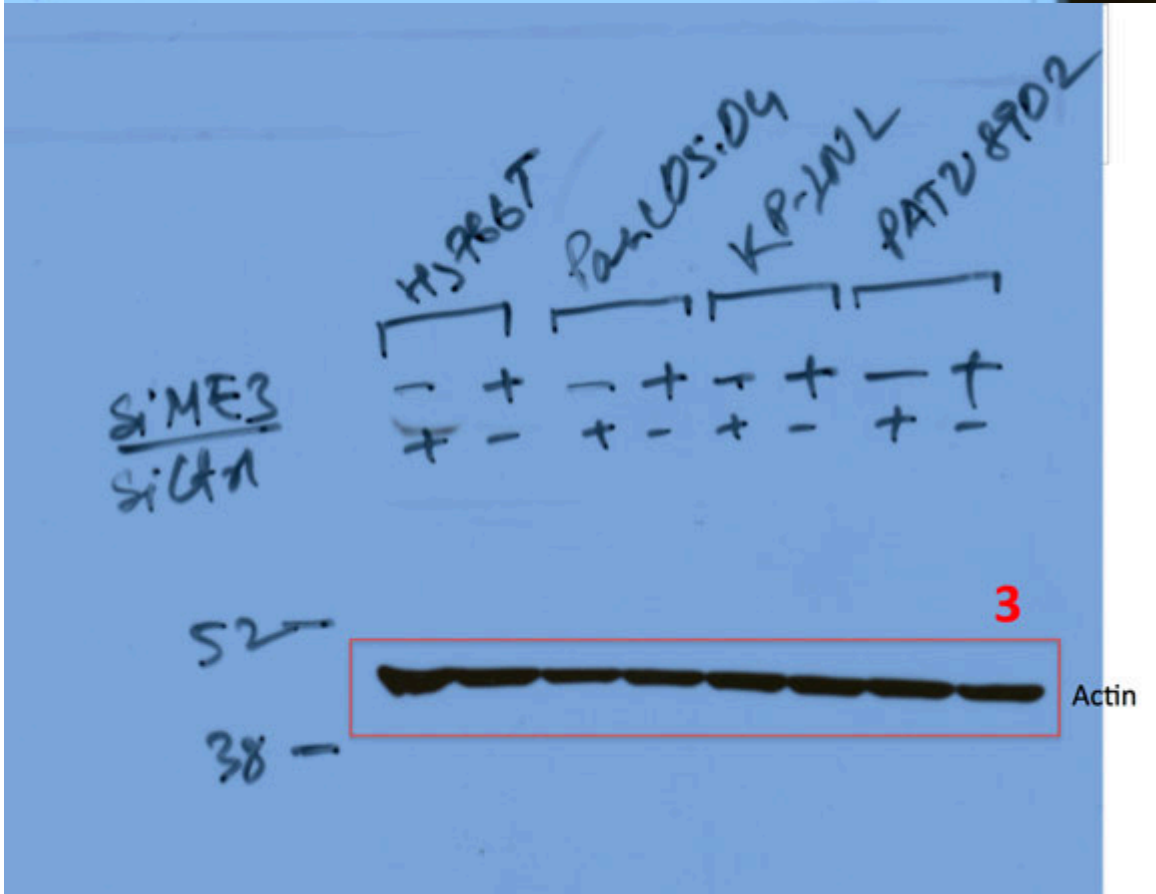

# DIAGNOSIS SIMe3 pool

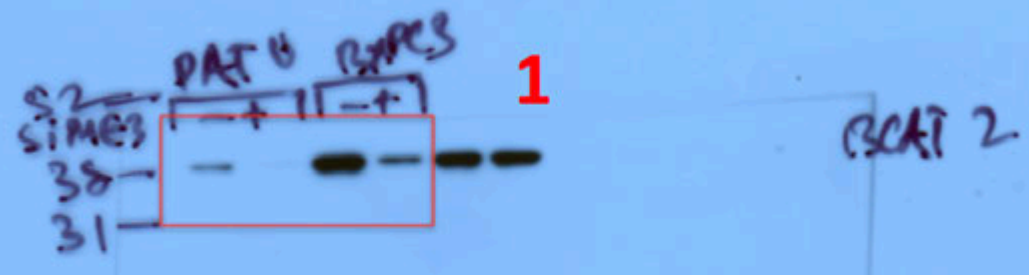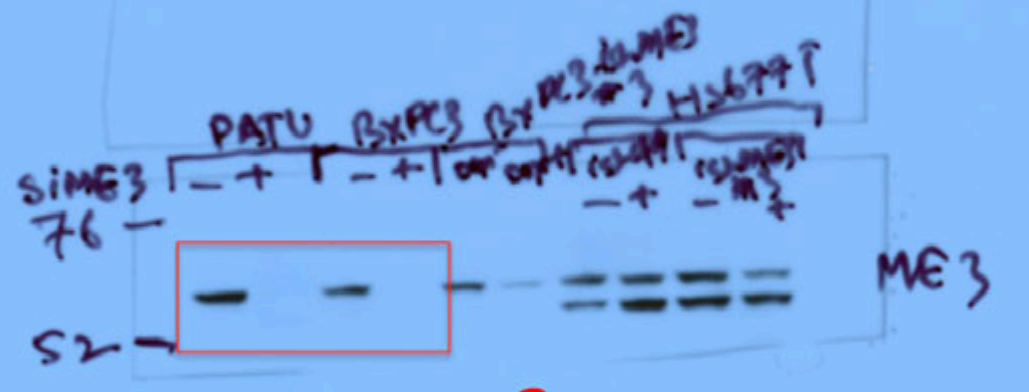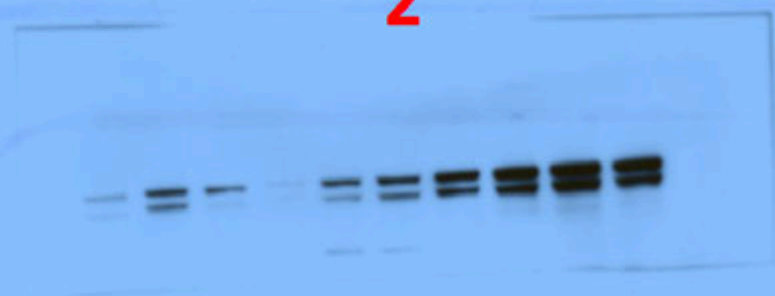

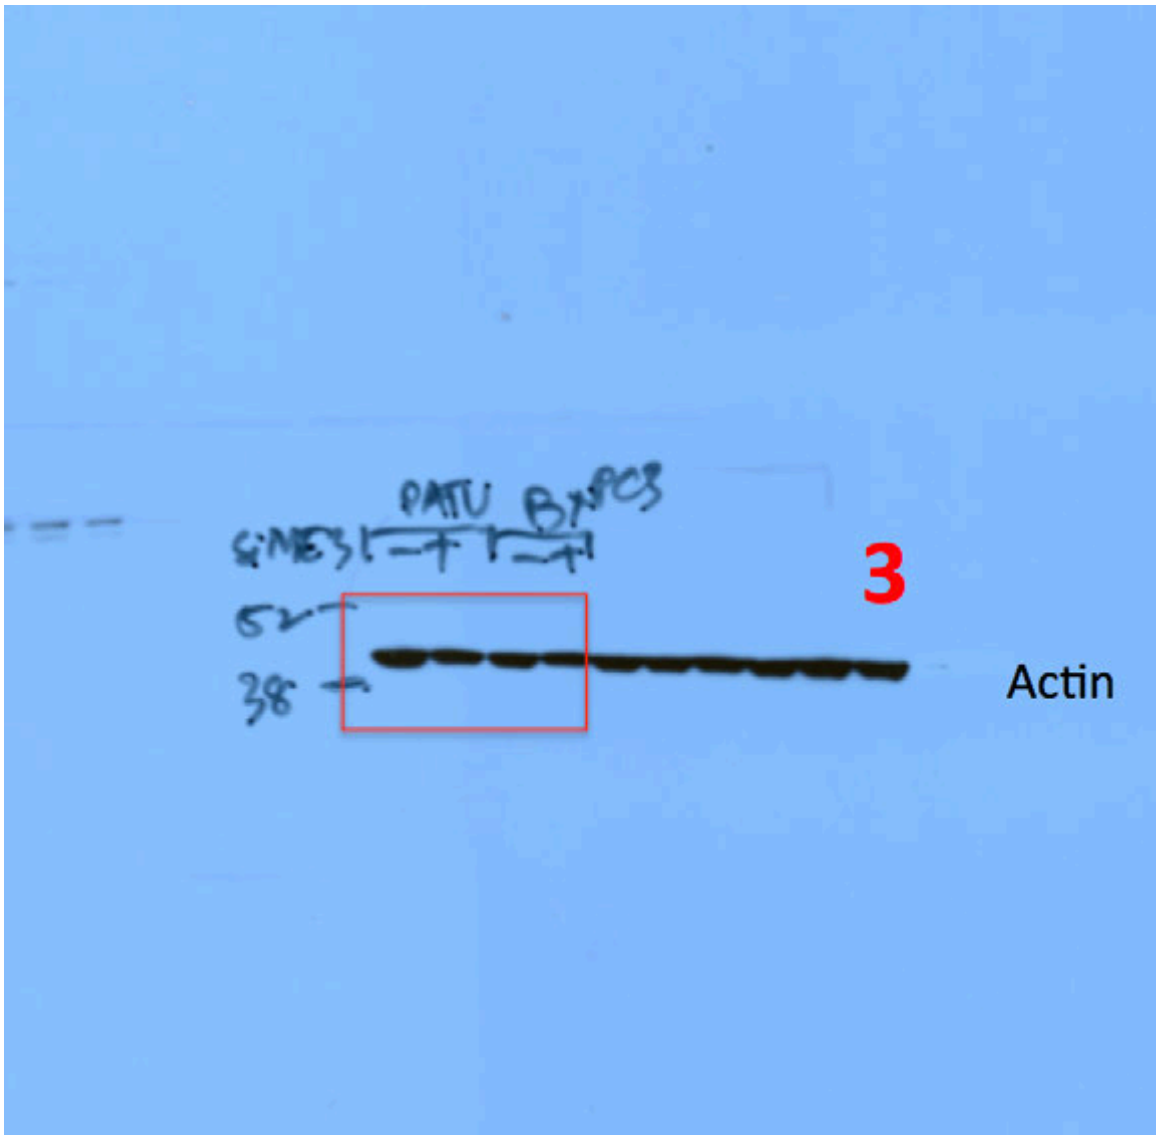

**Supplementary Figure 21:** Un-cropped immunoblot scans for **Extended Fig 8f**. Raw film scans with red box indicating the area shown in the display. Numbers in red indicates the panel (numbered from top to down) in the figure.

# Supplementary Figure 22

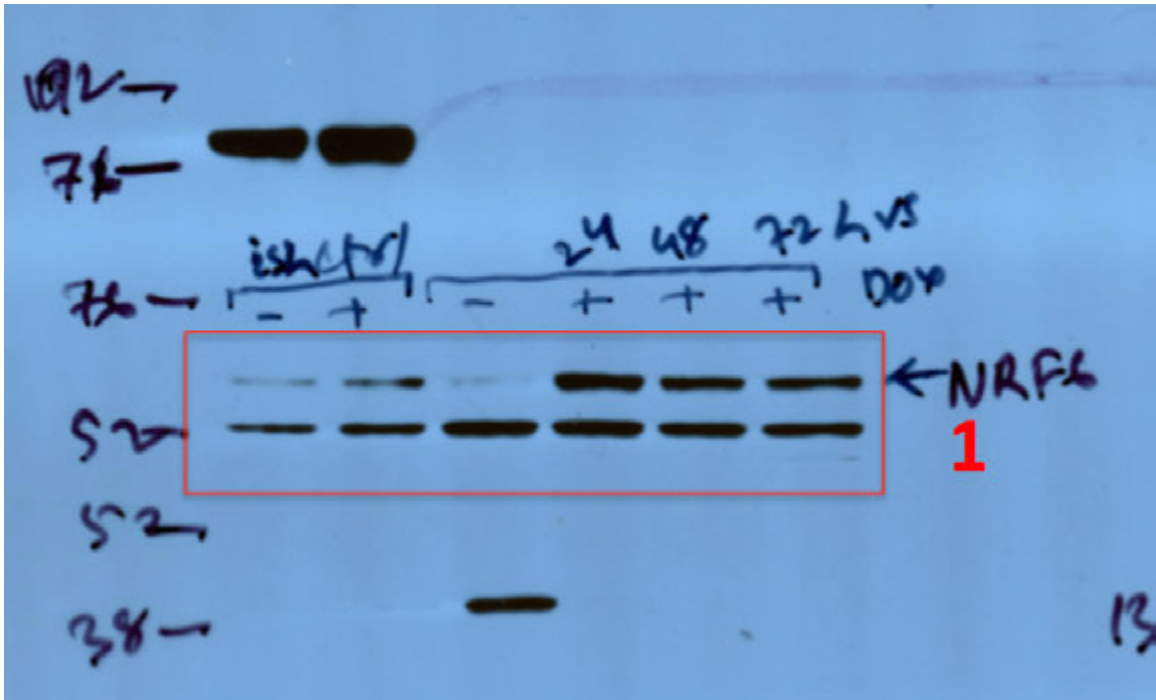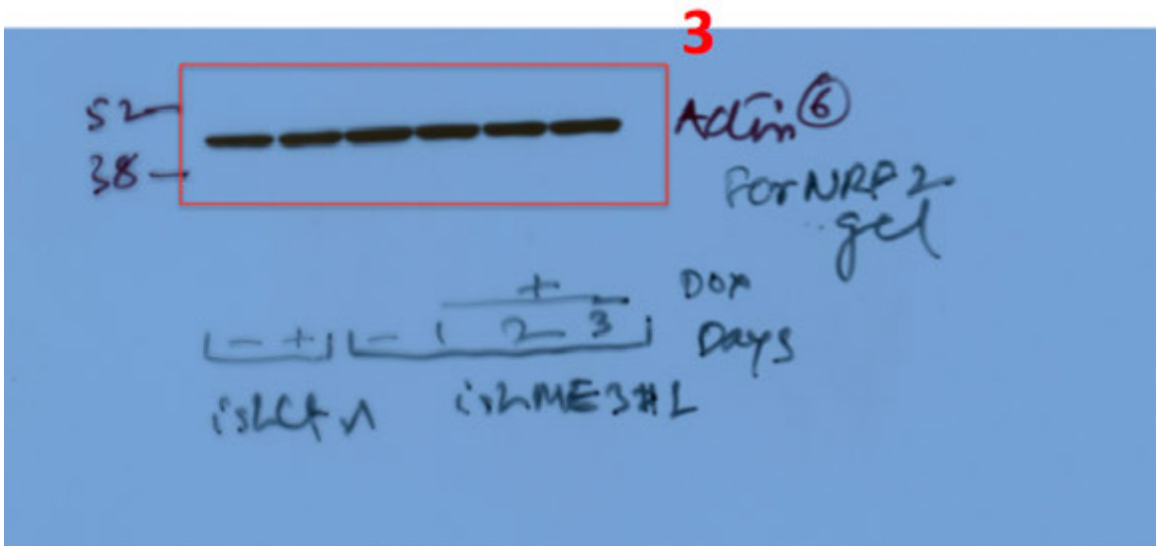

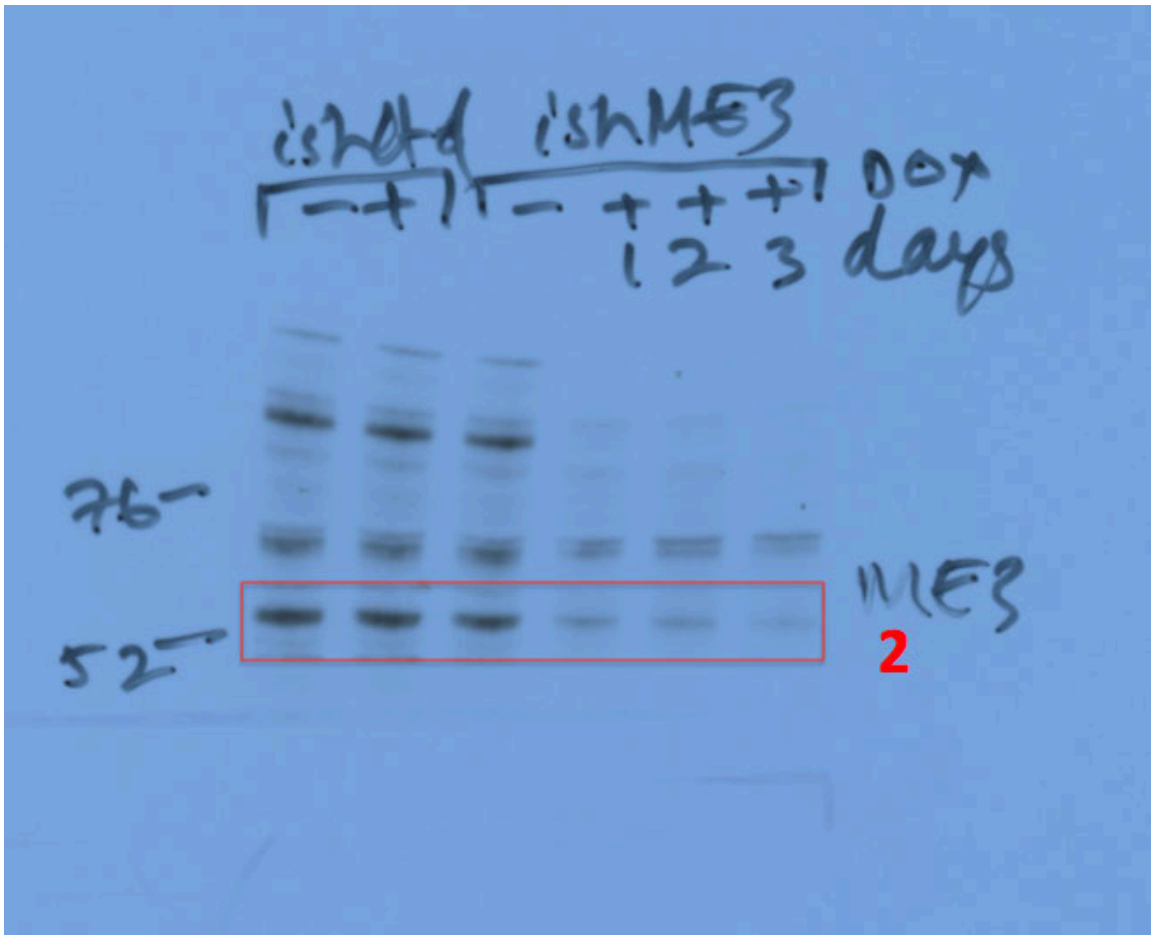

**Supplementary Figure 22:** Un-cropped immunoblot scans for **Extended Fig 8g**.

Raw film scans with red box indicating the area shown in the display. Numbers in red indicates the panel (numbered from top to down) in the figure.

# Supplementary Figure 23

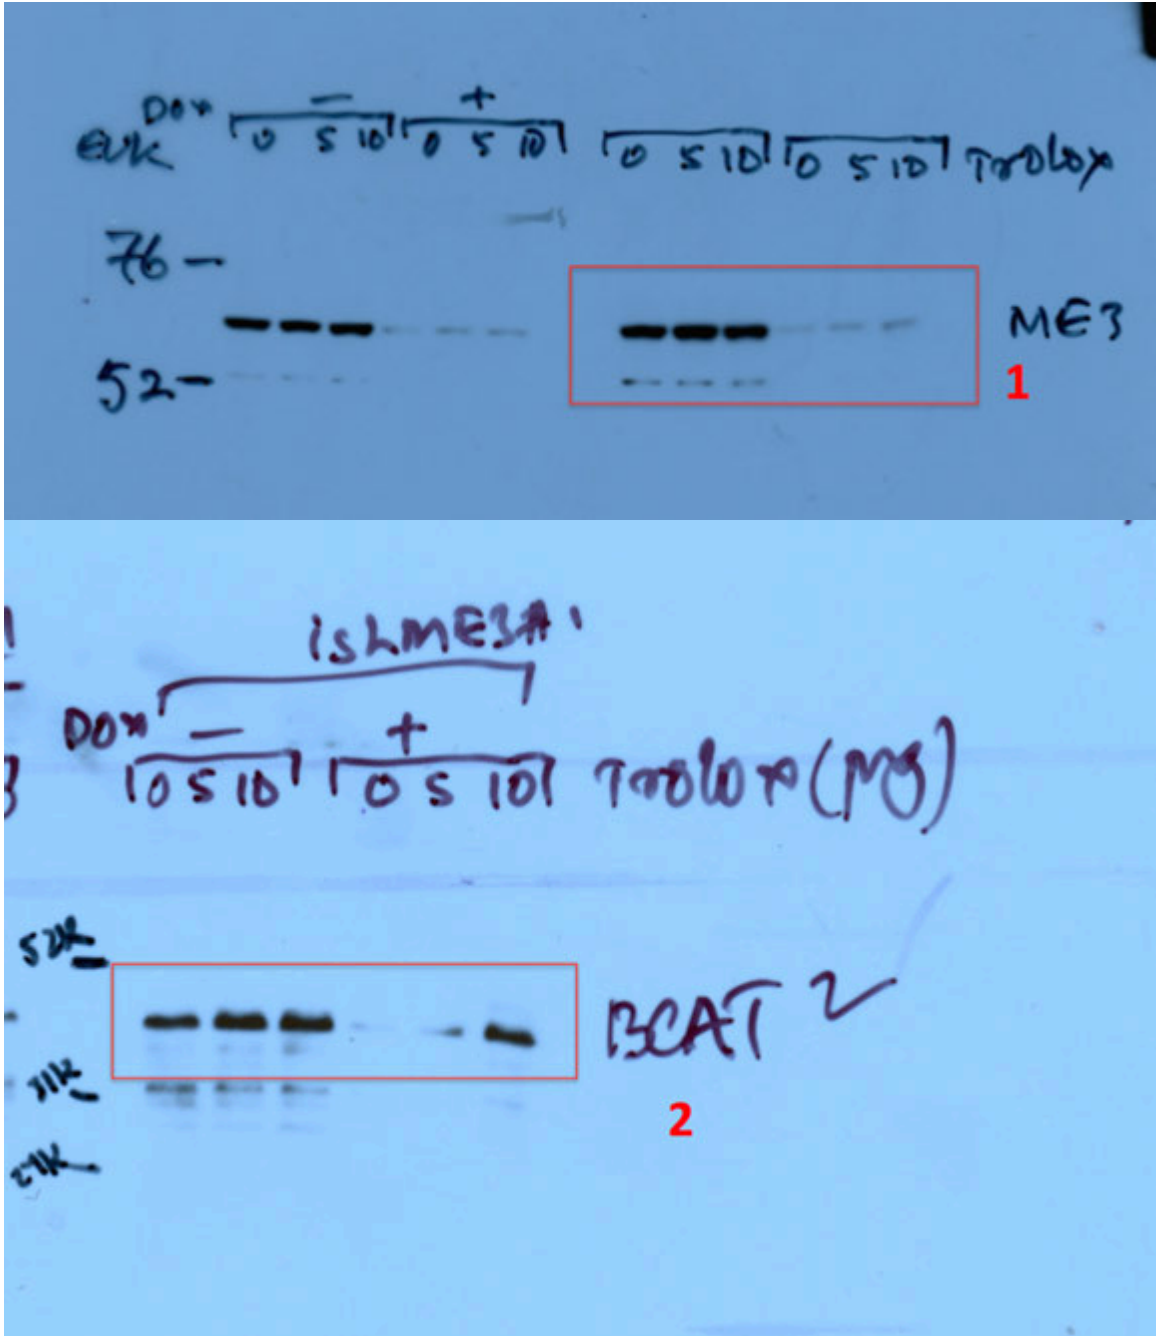

-DDP                      +DDP  
| 0   5   10 |   | 0   5   10 |   | Total

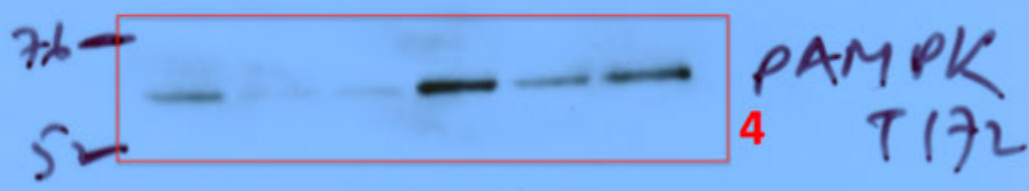

-                      +  
| 0   5   10<sup>NI</sup> |   | 0   5   10   20<sup>NI</sup> |   | Total

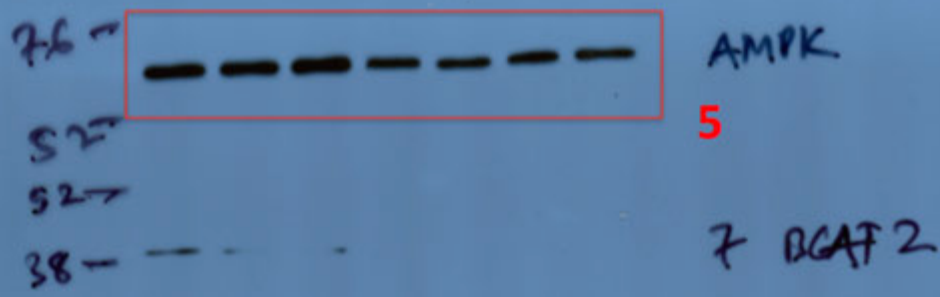

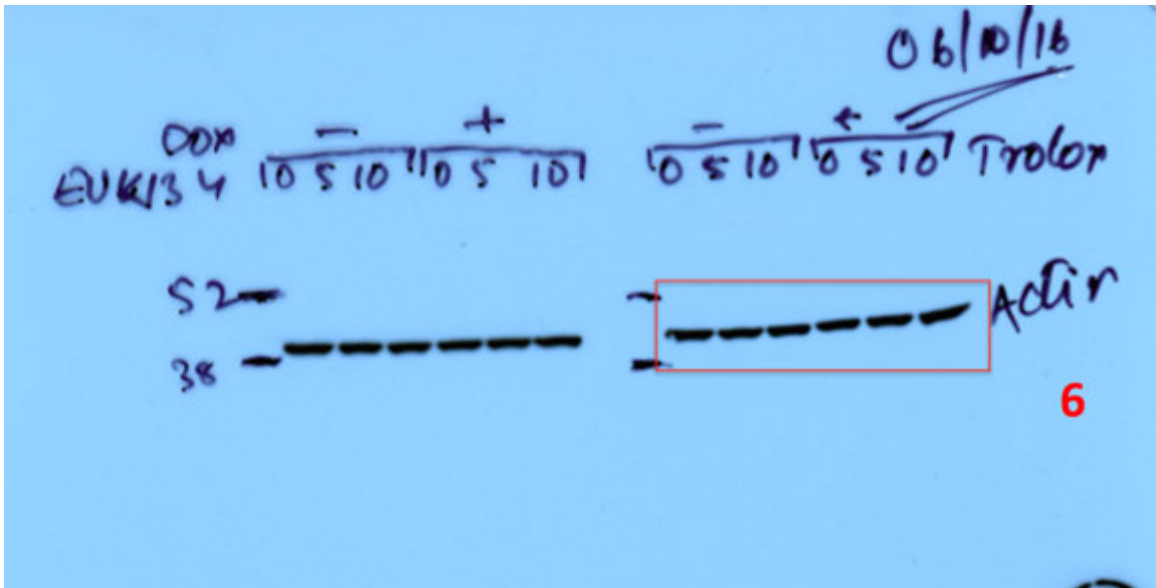

**Supplementary Figure 23:** Un-cropped immunoblot scans for **Extended Fig 9c**. Raw film scans with red box indicating the area shown in the display. Numbers in red indicates the panel (numbered from top to down) in the figure.



# Supplementary Figure 24

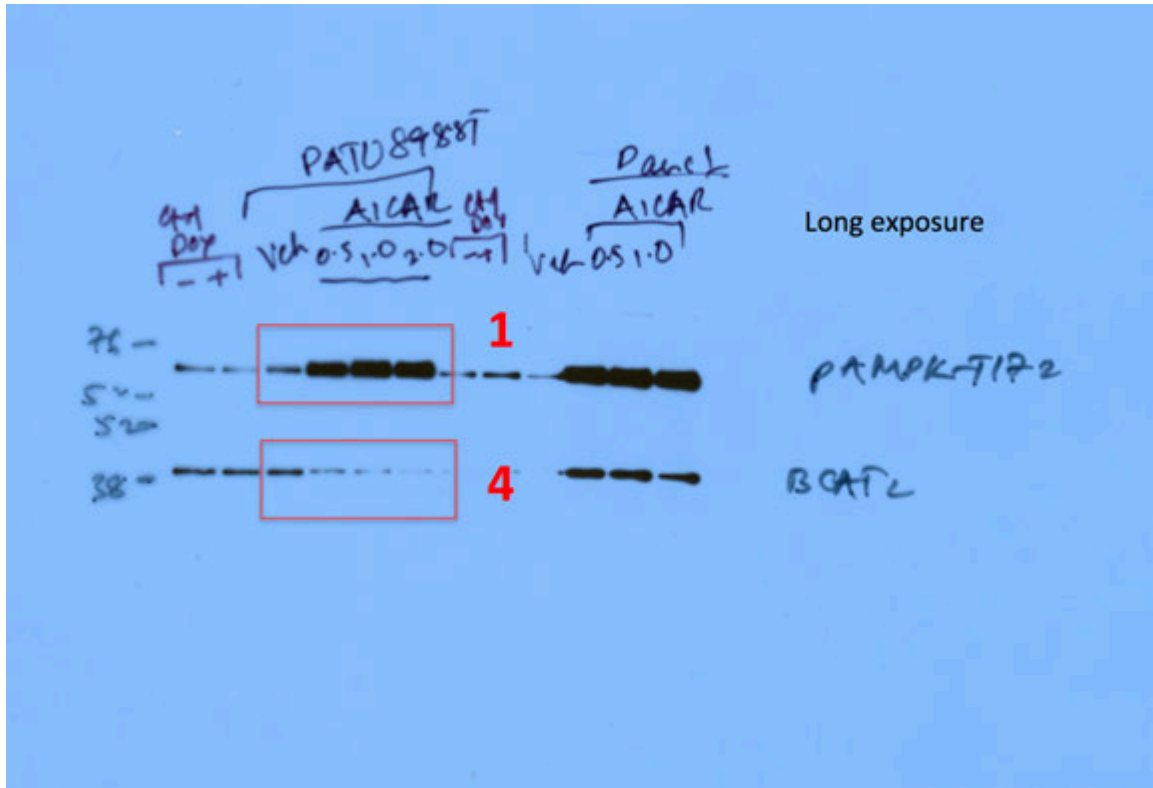

Short exposure

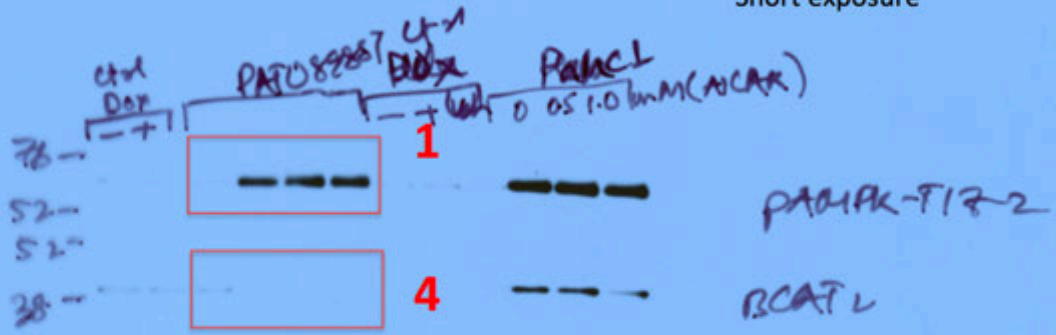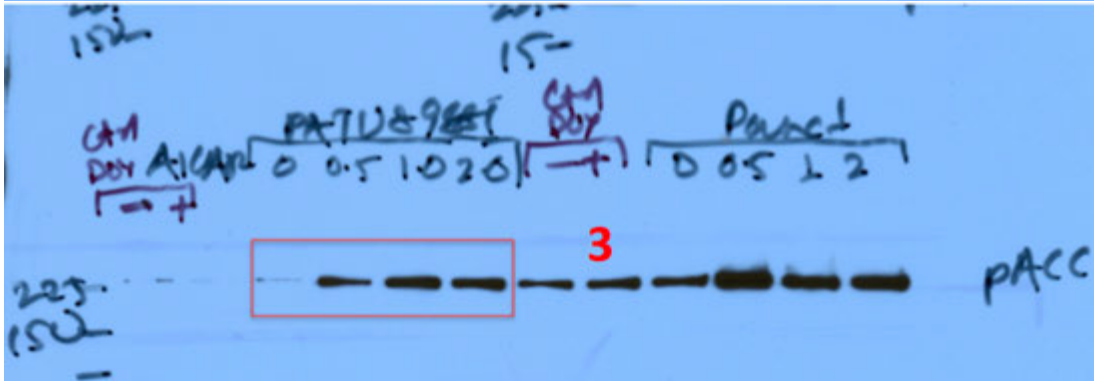

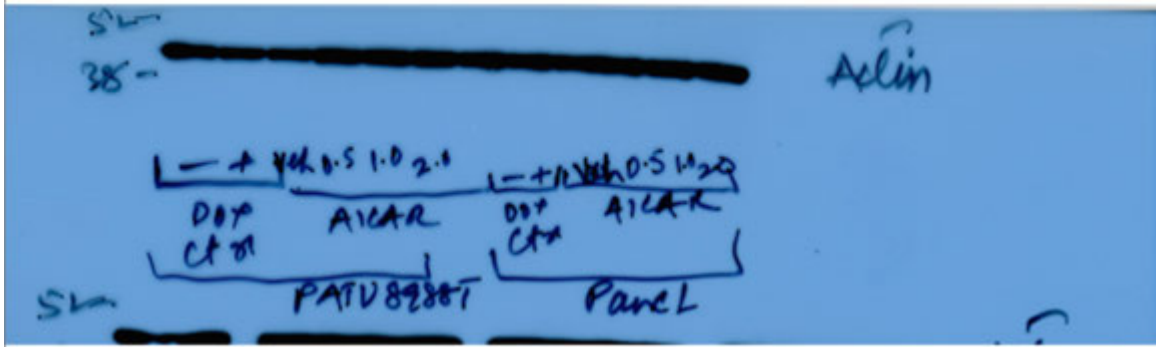

**Supplementary Figure 24:** Un-cropped immunoblot scans for **Extended Fig 9d**. Raw film scans with red box indicating the area shown in the display. Numbers in red indicates the panel (numbered from top to down) in the figure.
